# Supplementary material for: Stretchable surface electromyography electrode array patch for tendon location and muscle injury prevention
Source: PubMed Central journal article supplement (PMC10576757; doi:10.1038/s41467-023-42149-x), 2023-10-14
Supplement: 41467_2023_42149_MOESM2_ESM.pdf [file 41467_2023_42149_MOESM2_ESM.pdf]

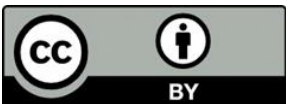

**Open Access** This file is licensed under a Creative Commons Attribution 4.0 International License, which permits use, sharing, adaptation, distribution and reproduction in any medium or format, as long as you give appropriate credit to the original author(s) and the source, provide a link to the Creative Commons license, and indicate if changes were made. In the cases where the authors are anonymous, such as is the case for the reports of anonymous peer reviewers, author attribution should be to 'Anonymous Referee' followed by a clear attribution to the source work. The images or other third party material in this file are included in the article's Creative Commons license, unless indicated otherwise in a credit line to the material. If material is not included in the article's Creative Commons license and your intended use is not permitted by statutory regulation or exceeds the permitted use, you will need to obtain permission directly from the copyright holder. To view a copy of this license, visit <http://creativecommons.org/licenses/by/4.0/>.

Reviewers' comments:

Reviewer #1 (Remarks to the Author):

Yang et al. reports the fabrication of stretchable surface electromyography electrode array patch enabled by the combination of an adhesive dry electrode array and metal-polymer electrode array patch. The resulting electrode array shows long-term application capability with good durability and biocompatibility. The authors demonstrated the electrode array by the application of tendon location and muscle injury prevention. This study is well organized and the performance of the electrode array are well characterized. The results are interesting, which should be impacts on the design of dry electrodes and the development of surface electromyography. Therefore, I would like recommend the publication of this work by minor revision.

1)The mechanical properties of the electrodes are important for the practical application as dry electrodes for skin adhesion. It is suggested to provides some details characterization of the electrodes, such as modulus, stretchability, and reversibility.

2)The resolution of figures needs to be improved.

3)The authors claimed that “As a result, how to fabricate a conformal, adhesive and robust dry electrode becomes an issue to address” in the introduction. Actually, to address this issue, some recent work (cited as Ref. 3) based on the supramolecular solvent ( $\beta$ -cyclodextrin and citric acid), PVA and PEDOT:PSS shows soft and conformal adhesive properties as a dry electrode for the monitoring of physiological electric signals as well as flexible electronic devices. Therefore, it is suggested to provide some in depth discussion for this issue in the introduction part.

Reviewer #2 (Remarks to the Author):

This manuscript reports a stretchable surface electromyography electrode array patch, which was made by integrating liquid metal based stretchable circuit with PEDOT:PSS based soft dry electrodes. The authors first carefully checked the performance of the electrode and then showed its potential applications in predicting muscle-tendon junction location and muscle injury prevention. The research topic is interesting and the work presents some impressive results. Here are some comments which should be addressed before its consideration for publication:

1. The PPT dry electrode, as a highlight of the paper, is critically important to the recording of sEMG. However, it seems that the same material with similar recipe has already been reported and used for epidermal biopotential measurement in the literature [1]. What's the novelty and challenge of the PPT dry electrode in this paper?
2. For Figure 6, the sEMG signal pattern is strongly and frequently influenced by the innervation zone [2, 3], in this case, neither the RMS or the mean frequency could be monotonous. How to predict the muscle-tendon junction location?
3. Why is value of 0.5 suitable as the muscle-tendon junction position, please explain or add related reference.
4. The inter-electrode distance could be largely changed during the isometric task from flexion and extension due to the deformation of the sEMG array patch adhered on muscle, how to define its effect?
5. For Figure 4g, we agree that decreasing median frequencies indicated fatigue of the muscle. However, the authors claimed the decreasing value of slopes of median frequencies indicated the fact that muscle became more fatigued. If so, the slopes of median frequencies during each task (30 s) should not be a constant since the muscle is getting fatigue as the time goes. Please have a check and related reference are needed.
6. As shown in Figure 3d, TPP electrodes can work superbly with SNR level above 20 dB for almost 5 days, and then get worse. Please give the reason that decreases the SNR of PPT electrodes for long-term measurement up to 5 days.
7. How about the adhesion, skin-electrode impedance and SNR of the sEMG electrode array patch on the skin when after, e.g., 200 times, movements (compress or stretch)?
8. Could be the sEMG electrode array patch be used repetitively?
9. Please specific the thickness of each layer of the sEMG electrode array patch.
10. Bipolar recording was used for single-channel TPP electrode (Figure 4e) and unipolar recording was used for MEAP, why and what's the different?

## Reference

- [1]. Cao, J. et al. Stretchable and Self-Adhesive PEDOT:PSS Blend with High Sweat Tolerance as Conformal Biopotential Dry Electrodes. *ACS Appl. Mater. Interfaces* 14, 39159–39171 (2022).
- [2]. Farina D, Madeleine P, Graven-Nielsen T, et al. Standardising surface electromyogram recordings for assessment of activity and fatigue in the human upper trapezius muscle[J]. *European journal of applied physiology*, 2002, 86(6): 469-478.
- [3]. Beretta Piccoli M, Rainoldi A, Heitz C, et al. Innervation zone locations in 43 superficial muscles: toward a standardization of electrode positioning[J]. *Muscle & nerve*, 2014, 49(3): 413-421.

Reviewer #3 (Remarks to the Author):

The manuscript describes a surface electromyography electrode, which is novel, as the authors state, because it is characterised by the fact that it adheres adhesively to the skin surface, is stretchable and forms an array (see abstract). This claim by itself shows that the authors seem to be unfamiliar with the state-of-the-art in surface electromyography (sEMG). Adhesive sEMG electrodes that adhere independently to the surface of the skin have been available for several years. The manuscript does not comment on this, nor does it compare the supposedly so good new electrode with it. Instead, an unspecified Ag/AgCl electrode is used for comparison, which, as can be seen from the figures, does not correspond to the standard for sEMG electrodes. It is therefore doubtful to what the electrode introduced in the manuscript is compared to and how meaningful this comparison is. Electrode arrays that adhere to the skin surface for long periods of time have also been described since the 1990s and are now commercially available. There is no reference to this in the manuscript either, nor is the introduced electrode compared to them.

This leaves the property of stretchability, which according to the authors should improve the quality of sEMG signals. The advantages and disadvantages of stretchable electrode arrays have been debated among sEMG experts for many years. The problem is, that the interelectrode distance changes when the array is stretched. This affects the frequency spectrum of the sEMG signal in the case of a bipolar lead. Investigations in the frequency domain, as suggested by the authors for fatigue detection, are therefore not valid for non-isometric contractions, as it is not possible to exclude beyond doubt that a measured change in the frequency domain is not due to a change in the electrode distance. Stretchable electrode arrays are therefore fundamentally unsuitable for such applications.

This brings me to another problem concerning the manuscript. The manuscript is full of claims - often in the superlative - about signal quality and possible applications of the described electrode, which are not statistically proven. They seem to be the purely subjective perceptions of the authors. This becomes particularly clear in Fig. 2 k, in which a signal with a motion artefact, which occur from time to time but not regularly, was compared with the signal detected with the introduced electrode. The manuscript does not describe whether and if so how repeat measurements were carried out and how these were statistically evaluated to substantiate the statements made.

Fig. 4 a and e shows another problem that arises when characterising the quality of the novel electrodes. The electrodes of the devices used for comparison are not located in the same position as the novel electrodes. Rather, the comparison signals are derived at less favourable positions, which has a negative influence on the signal amplitude, the SNR and the frequency spectrum. An objective comparison between the two devices is not possible under these conditions.

Finally, a comment on electrode arrays. The use of electrode arrays has been known for a long time under the pseudonym High Density sEMG (HDsEMG) and is widely used in different research questions. The method is called sEMG imaging and the "heat maps" shown in Fig. 5 g and h are called "muscle activity maps" in the literature. The fact that HDsEMG is suitable for localising anatomical structures such as the neuromuscular junction or tendon insertion has been known since the 1990s and has been studied in a number of different investigations. In connection with fatigue and pain, a change in the spatial distribution of the activity of the muscle has already been demonstrated, as well as a change in

the spectrum of the signal. This fundamental work is not mentioned anywhere in the manuscript. Rather, the impression is given that such investigations are only made possible by the new type of electrode.

1           **Response to reviewers for the manuscript (NCOMMS-22-46103A-Z)**

10

11   **Reviewer #1 (Remarks to the Author):**

12

13   *Yang et al. reports the fabrication of stretchable surface electromyography electrode*  
14   *array patch enabled by the combination of an adhesive dry electrode array and*  
15   *metal-polymer electrode array patch. The resulting electrode array shows long-term*  
16   *application capability with good durability and biocompatibility. The authors*  
17   *demonstrated the electrode array by the application of tendon location and muscle*  
18   *injury prevention. This study is well organized and the performance of the electrode*  
19   *array are well characterized. The results are interesting, which should be impacts on*  
20   *the design of dry electrodes and the development of surface electromyography.*  
21   *Therefore, I would like recommend the publication of this work by minor revision.*

22

23   **Our response:** We appreciate the reviewer taking the time to carefully read our  
24   manuscript and provide such excellent feedback.

25

26   *1)The mechanical properties of the electrodes are important for the practical*  
27   *application as dry electrodes for skin adhesion. It is suggested to provides some*  
28   *details characterization of the electrodes, such as modulus, stretchability, and*  
29   *reversibility.*

30

31   **Our response:** We appreciate the reviewer pointing out the lack of mechanical

32 characterizations. Following the reviewer's advice, we conducted a few studies,  
33 including tensile testing and repeated stretch measures. We agree that these findings  
34 are significant, so we include them in Fig. 2.

35 Meanwhile, we transfer the original Fig. 2j to Supplementary Fig. 7.

36

37 Our modifications on Page 8:

38 Lower Young's modulus gives a better compliance and stretchability to the film,  
39 which is are vital to the conformal adhesion between electrodes and skin<sup>58</sup>. This was  
40 also proved by the results of tensile and peeling tests of TPP films with increasing  
41 concentration of TA (Fig. 2h, i). Such observations helped us use the final weight  
42 concentration of TA at 8%, which makes the film soft and adhesive but not easy to  
43 tear. This TPP film shows elongation at break of 188%, Young's modulus of 644 kPa  
44 and adhesive forces of 0.58 N/cm on the skin. Once the concentration of the  
45 constituents of the TPP solution was determined, each constituent's indispensability  
46 was verified by the changes in conductivity, stretchability, and adhesiveness of the  
47 electrode (Supplementary Fig. 7). Meanwhile, such TPP film showed good  
48 repeatability after being stretched to a strain of 20% for 1000 cycles (Fig. 2j).

49

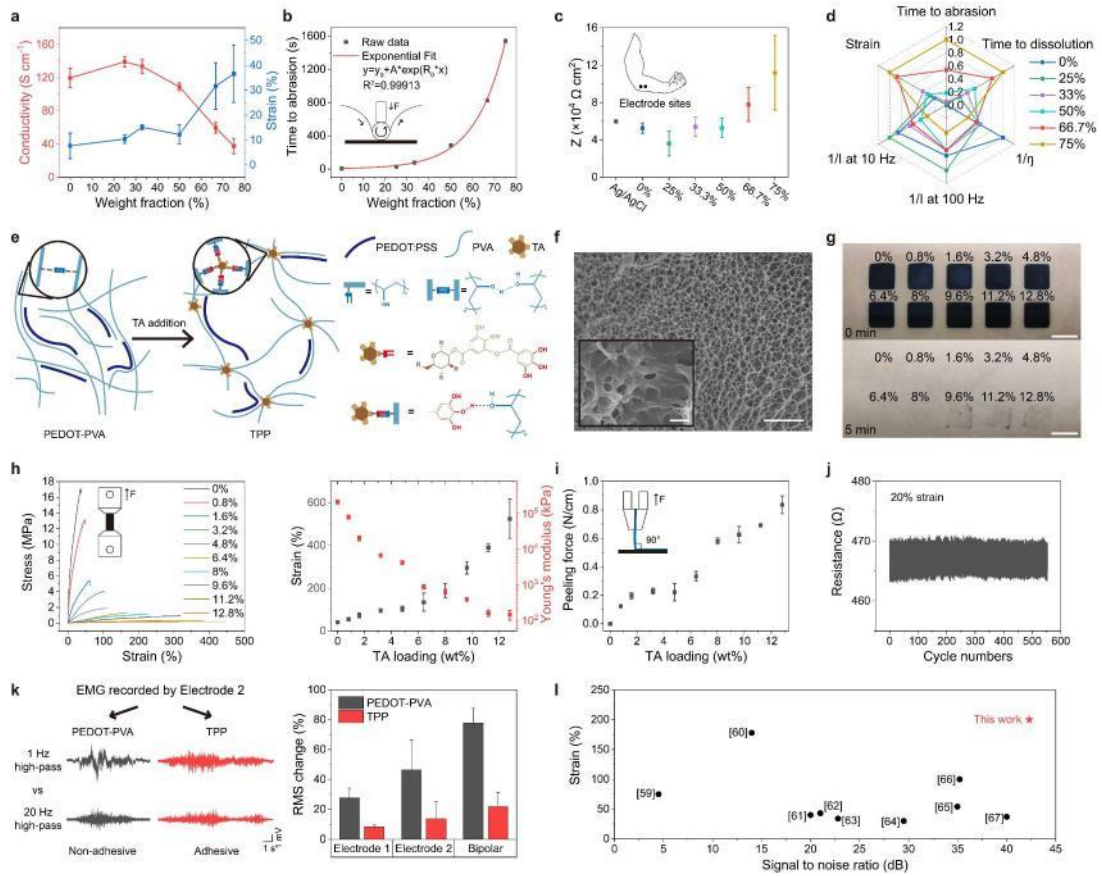

50

51 ...Scale bar: 4  $\mu m$ ; inset: 1  $\mu m$ .



52 h Tensile stress–strain curves, strain and Young’s modulus of Strain of TPP films.

53 i Peeling force of TPP films on the skin.

54 j Real-time monitoring of the TPP film by stretching the film from a strain of 0 to  
55 20% for about 500 cycles.

56 k EMG signals recorded by PEDOT-PVA and TPP electrodes. Electrode...

57

58 See Page 32: ‘The tensile testing was performed by a universal testing system (Instron

59 68TM-5, USA), size of PEDOT-PVA and TPP films was 30 mm long and 10 mm

60 wide. The stroke speed of the measurement was 0.5 mm min<sup>-1</sup>.’

61

62 *2)The resolution of figures needs to be improved.*

63

64 Our response: We thank the reviewer for the requested change in resolution. We

65 provide updated PDF document with higher resolution. We have Tag Image File

66 Format for each figure if this manuscript gets published.

67

68 3)The authors claimed that “As a result, how to fabricate a conformal, adhesive and  
69 robust dry electrode becomes an issue to address” in the introduction. Actually, to  
70 address this issue, some recent work (cited as Ref. 3) based on the supramolecular  
71 solvent ( $\beta$ -cyclodextrin and citric acid), PVA and PEDOT:PSS shows soft and  
72 conformal adhesive properties as a dry electrode for the monitoring of physiological  
73 electric signals as well as flexible electronic devices. Therefore, it is suggested to  
74 provide some in depth discussion for this issue in the introduction part.

75

76 **Our response:** We value the reviewer's careful and thoughtful feedback on our  
77 manuscript. This statement prompted us to consider explaining material choices for  
78 flexible electronics. Conductivity is the basis, which allows materials to be classified  
79 into four types: metal, carbon materials, hydrogels, and conductive polymers. Normal  
80 metal (except liquid metal) cannot be stretched unless modified to special structure,  
81 and it is extremely difficult to impart adhesiveness on the metal itself; carbon  
82 materials, such as carbon nanotubes and graphene, have a high Young's modulus,  
83 making them unsuitable for bioelectronics (Matter (2022) 5, 1104-1136). In  
84 comparison, employing hydrogel and conductive polymers that can be fine-tuned  
85 become advantageous tactics since researchers may provide them specific  
86 functionalities depending on the application scenarios. Unfortunately, it is quite  
87 difficult to create a material that is ideal in every way. Sometimes improving one  
88 property of a material implies sacrificing another. For example, hydrogel has a lot of  
89 water but dehydrates quickly; when the conductive polymer is more stretchable, it  
90 becomes less conductive. This is also mentioned in Ref. 3 (Nature Communications  
91 (2022) 13:358), which states: *'Taking into account the compromise in mechanical  
92 flexibility, conductivity, and interface adhesion (in subsequent discussions), SACPs  
93 with PEDOT:PSS mass ratio of 3.6% presented suitable mechanical property  
94 (modulus of 401.9 kPa) and conductivity (3.79 S/cm) meet the requirements of  
95 bioelectrode.'*

96 We also need to point out that Ref. 3 is an excellent contribution to the field of dry  
97 electrode, but our work has a slightly different focus to Ref. 3. The main point of Ref.  
98 3 is to show the potential of SACPs for future bioelectronic devices, for example, that  
99 making a better tool to visualize EMG. The focus of our work is to provide an array  
100 that can monitor EMG over time to provide detailed information from different

101 features of muscles. Additionally, the applications of SACPs in Fig. 5 and 6 of Ref. 3  
102 didn't mention an array, which increased our appreciation for the array design of our  
103 MEAP because commercial gel electrodes cannot accomplish the same recording sites  
104 in the same area as MEAP. This difficulty is simply solved by using patternable liquid  
105 metal circuitry. We must underline this originality once again.

106

107 Considering the above, we add the paragraph on Page 4: 'As a result, how to fabricate  
108 a conformal, adhesive and robust dry electrode becomes an issue to address. Dry  
109 electrodes force the material to be classified into three types: metal, carbon materials,  
110 and conductive polymers. Conventional metal and carbon materials have exceedingly  
111 high Young's modulus, which must be fabricated into micro-/nano-structures using  
112 complicated procedures for flexible bioelectronics. In addition, employing conductive  
113 polymers that can be variably tuned becomes a more advantageous method since  
114 researchers may provide them specific functionalities depending on the application  
115 scenarios.'

116 We also add results of conductivity of TPP films with different TA loadings in  
117 Supplementary Fig. 9:

118

119 See page 8: 'The conductivity and electrode-skin impedance of TPP film were also  
120 examined (Supplementary Fig. 9, 10).'

121

122 We thank the reviewer once more, for the thoughtful assessment and comments. We  
123 appreciated the chance to respond to the reviewer's suggestions in this revised

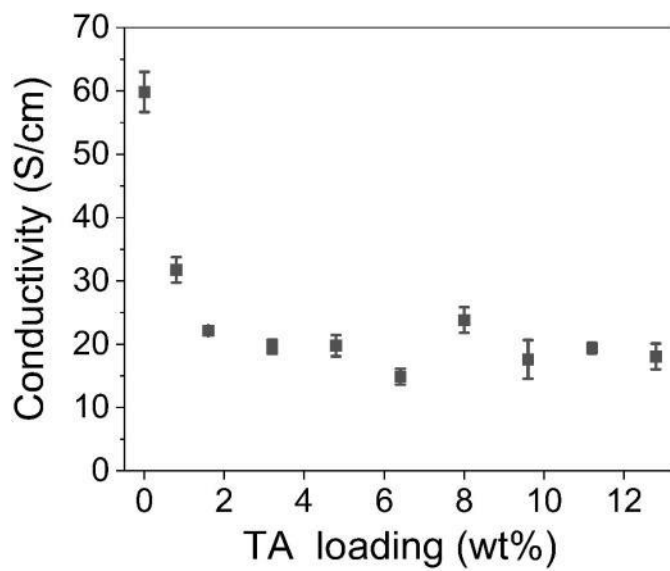

124 manuscript because we considered their advice to be really insightful.

125

126

127 **Reviewer #2 (Remarks to the Author):**

128

129 *This manuscript reports a stretchable surface electromyography electrode array*  
130 *patch, which was made by integrating liquid metal based stretchable circuit with*  
131 *PEDOT:PSS based soft dry electrodes. The authors first carefully checked the*  
132 *performance of the electrode and then showed its potential applications in predicting*  
133 *muscle-tendon junction location and muscle injury prevention. The research topic is*  
134 *interesting and the work presents some impressive results. Here are some comments*  
135 *which should be addressed before its consideration for publication:*

136

137 **Our response:** We value the reviewer's time spent reading our manuscript thoroughly  
138 and providing generally encouraging feedback. We are quite appreciative that the  
139 reviewer found the material to be innovative and recognized its potential for use in  
140 sports health and injury prevention.

141

142 *1. The PPT dry electrode, as a highlight of the paper, is critically important to the*  
143 *recording of sEMG. However, it seems that the same material with similar recipe has*  
144 *already been reported and used for epidermal biopotential measurement in the*  
145 *literature [1]. What's the novelty and challenge of the PPT dry electrode in this*  
146 *paper?*

147

148 **Our response:** We appreciate the reviewer's comment. Prior to submission we did  
149 find this article (Ref. 1), but it is important that the differences are carefully noted.  
150 The composition of ours are distinctly different from those mentioned in the article,  
151 resulting in our electrodes being very different in corresponding properties. A  
152 comparison table is presented below to show the difference in properties clearly and  
153 this was mentioned in Supplementary Table 1 in the original manuscript.

|                      | Material<br>s for<br>substrates | Multi-<br>channel<br>? | Young's<br>modulus | Strain      | The<br>adhesiveness<br>of electrode<br>(N/cm) | The<br>smallest<br>area of the<br>electrode<br>(mm <sup>2</sup> ) | Electrode-skin<br>impedance<br>at<br>100 Hz<br>(KΩ*cm <sup>2</sup> ) | Long-term<br>test (Hour) | RMS of<br>Noise<br>(μV) | Signal-to-<br>noise<br>ratio<br>(dB) |
|----------------------|---------------------------------|------------------------|--------------------|-------------|-----------------------------------------------|-------------------------------------------------------------------|----------------------------------------------------------------------|--------------------------|-------------------------|--------------------------------------|
| Ref.1                | N/A                             | No                     | 18.3<br>MPa        | 54%         | 0.28                                          | 16                                                                | 100                                                                  | N/A                      | 11.8                    | 34.96                                |
| <b>This<br/>work</b> | <b>PDMS</b>                     | <b>Yes</b>             | <b>645 kPa</b>     | <b>188%</b> | <b>0.58</b>                                   | <b>0.8</b>                                                        | <b>80</b>                                                            | <b>120</b>               | <b>1.0</b>              | <b>42.3±0.7</b>                      |

154 Our dry electrode has a far lower Young's modulus than theirs, which makes it softer,  
155 stickier, and more stretchable. The recorded EMG signal demonstrates how each of  
156 these elements helps electrodes adhere to the skin more effectively. Our electrodes'  
157 baseline noise decreased by a factor of ~10 than theirs, which ultimately results in a  
158 greater SNR. In order to investigate muscle loads, exhaustion, and tendon  
159 displacements, high-quality recording is essential. Our work has more potential for  
160 numerous applications due to its long-term stability (a lifetime of 5 days). More  
161 importantly, most of these electrodes—including Ref. 1—only perform the same  
162 function as Ag/AgCl hydrogel electrodes. The more literature we study, the more we  
163 believe that our liquid metal circuits in the patch is significantly distinct and superior.  
164 The liquid metal circuits enable multiple electrodes to record simultaneously over  
165 extended periods of time. We can create an array patch using this stretchable circuit,  
166 which further allows us to map muscle activity and locate muscle-tendon junctions.  
167 The fact that these measurements cannot be performed using Ag/AgCl hydrogel  
168 electrodes must be emphasized. In this paper, we think the dry electrode array is much  
169 more unique than the dry electrode itself.

170

171 To better clarify our novelty, we added following sentence in Discussion.

172 See page 29: **‘However, commercial hydrogel electrodes cannot accomplish the same**  
173 **recording sites in the same area as MEAP. This difficulty is simply solved by using**  
174 **patternable liquid metal circuitry. We must underline this originality once again.’**

175

176 *2. For Figure 6, the sEMG signal pattern is strongly and frequently influenced by the*  
177 *innervation zone [2, 3], in this case, neither the RMS or the mean frequency could be*  
178 *monotonous. How to predict the muscle-tendon junction location?*

179 **Our response:** We appreciate the reviewer's meticulous and in-depth work. It is  
180 accurate to say that ‘the innervation zone often and substantially influences the sEMG  
181 signal pattern; hence, neither the RMS nor the mean frequency could be monotonous.’  
182 Yet only when the sEMG is captured using a bipolar (single differential) arrangement  
183 can this conclusion be made. As stated in ‘Part 2.1’ of Ref. 4 ‘... can be detected  
184 using the monopolar or single differential (SD, bipolar) technique, ...’ the ‘bipolar’  
185 and ‘single differential’ montage are the same, but distinct from the “monopolar.”  
186 On closer examination of the 2 articles the reviewer provided, it was found that the  
187 signals were identified in single differential mode in

188 A) the ‘*Method*’ section of Ref. 2 that ‘*The signals were detected in single*  
189 *differential mode to minimize line interference, ...*’;  
190 B) in the ‘*Equipment*’ section of Ref. 3 that ‘*... or 2.5 mm (silver pins 1 mm long,*  
191 *1 mm diameter) (LISiN and OT Bioelettronica, Turin, Italy) in single*  
192 *differential configuration.*’

193

194 In addition, as seen in Fig. 4 in Ref. 4, the amplitude of EMG recorded in monopolar  
195 mode, decreases from the innervation zone to the tendon area, which is monotonous.  
196 Based on this, we can identify the muscle-tendon junction location. We regret for  
197 using the word ‘unipolar’ instead of ‘monopolar’ in the paper, which may have caused  
198 some misunderstanding. Thus, on page 34, we make the following changes:

199

200 See Page 34: ‘**Bipolar recording was used for single-channel TPP electrode and**  
201 **monopolar recording was used for MEAP to obtain sEMG signals.**’

202

203 *3. Why is value of 0.5 suitable as the muscle-tendon junction position, please explain*  
204 *or add related reference.*

205 **Our response:** We appreciate the reviewer bringing this to our attention. We are sorry  
206 that we cannot locate any relevant references because we are the first team to do  
207 muscle-tendon junction localization using a sEMG electrode array, but this value of  
208 0.5 was born with repeated verifications. When we used the MEAP to record on the  
209 biceps, we discovered that various channels responded differently in mean frequency  
210 (see Supplementary Fig. 16), and they consistently maintained a monotonous order  
211 from tendon to muscle. We can plainly discern the junction site and its relative  
212 position with our array using ultrasound images (the gold standard for tendon  
213 monitoring) (see Fig. 7b). After comparing the results, we discovered that the junction  
214 location was usually near to 0.5 after normalization (see Supplementary video 5).  
215 In other words, we always saw the junction between two channels with normalized  
216 values closer to 0.5 (see Fig. 7c). We further confirmed this rule by palpating the  
217 biceps and Achilles tendon directly, and eventually established that 0.5 was the best  
218 value to discern the junction point. After that, we tested this rule with palpation on  
219 subjects 2 and 3. The outcomes were likewise comparable. We accept that this  
220 method of locating may not be as exact as magnetic resonance imaging or ultrasound  
221 imaging, but the convenience provided by our array should be underscored. Instead of



222 making this document excessively confusing, we decided to examine and summarize  
223 a mature method or accuracy improvements in another study.

224

225 To clarify, we amended the phrase on page 22: ‘According to the results of ultrasound  
226 image, we found the junction location was always close to the value of 0.5 after  
227 normalization. We defined the channel with value of 0.5 is suitable as the muscle-  
228 tendon junction position (Supplementary Text 1). This observation was also verified  
229 by palpation on the biceps brachii and the Achilles tendon.’

230

231 *4. The inter-electrode distance could be largely changed during the isometric task*  
232 *from flexion and extension due to the deformation of the sEMG array patch adhered*  
233 *on muscle, how to define its effect?*

234 **Our response:** We appreciate the reviewer bringing this IED problem to our  
235 attention. RMS and frequency can fluctuate as the IED between two electrodes  
236 changes, especially in bipolar montage recording. Nevertheless, the recording setups  
237 are monopolar for the majority of applications employing MEAP in this publication,  
238 including identification of muscle loading, muscle exhaustion, and muscular activity  
239 map. Signals from each electrode are unrelated to one another. The sole application  
240 that may be affected is the location of the muscle-tendon junction, because the IEDs  
241 are not constant during muscle activity, which may produce an inaccuracy in the  
242 quantitative value of tendon displacements. However, we must underline that  
243 changing the IEDs will not affect the detection of junctions using our normalizing  
244 technique. Because the junction should always be located between two neighboring  
245 channels, we may utilize the value of 0.5 to establish which two channels are  
246 involved. In terms of the numerical value of tendon displacement, we have previously  
247 studied this issue and modified computation to reduce the effect as much as feasible.  
248 We added the demonstration in Supplementary Text 2.

249 See page 22: ‘We also improved calculation to make the influence of skin deformation  
250 as low as possible (Supplementary Text 2).’

251

252 Supplementary Text 2:

253 We measured the IEDs between neighboring channels at the muscle-tendon junction  
254 of the biceps distal tendon.

| Flexion degree | IED <sub>21-17</sub> (mm) | IED <sub>17-13</sub> (mm) | IED <sub>13-9</sub> (mm) | IED <sub>9-5</sub> (mm) | IED <sub>5-1</sub> (mm) |
|----------------|---------------------------|---------------------------|--------------------------|-------------------------|-------------------------|
| 30°            | 15 mm                     | 15 mm                     | 15 mm                    | 15 mm                   | 15 mm                   |
| 0°             | 15 mm                     | 15 mm                     | 16 mm                    | 18 mm                   | 18 mm                   |
| 110°           | 15 mm                     | 15 mm                     | 14 mm                    | 13 mm                   | 12 mm                   |

255 Since TPP electrodes are sticky and can adhere securely to the skin, the IED change is  
256 the same as skin deformation between two nearby electrodes. We evaluated IEDs in  
257 three distinct arm states: full extension (0°), full flexion (110°), and relax (30°). When  
258 the array was bonded to the skin during arm relaxation, the IEDs were all 15 mm. We  
259 discovered that when the muscle is moving, the deformations of skin on the muscle  
260 part are not obvious.

261 For example, we assume the junction is right in the middle between channels 5 and 1  
262 when the muscle is during full extension.

263 The calculated distance between junction and channel 21 is  $D_{ce} = IED_{21-17}(30^\circ) + IED_{17-13}(30^\circ) + IED_{13-9}(30^\circ) + IED_{9-5}(30^\circ) + 1/2 IED_{5-1}(30^\circ)$ ;  
264  
265 the realistic distance between junction and channel 21 is  $D_{re} = IED_{21-17}(0^\circ) + IED_{17-13}(0^\circ) + IED_{13-9}(0^\circ) + IED_{9-5}(0^\circ) + 1/2 IED_{5-1}(0^\circ)$  °

267 When the junction is right middle between channel 13 and 17 when full flexion,  
268 the calculated distance between junction and channel 21 is  $D_{cf} = IED_{21-17}(30^\circ) + 1/2 IED_{17-13}(30^\circ)$ ;  
269  
270 the realistic distance between junction and channel 21 is  $D_{rf} = IED_{21-17}(110^\circ) + 1/2 IED_{17-13}(110^\circ)$ .

272 Considering the absolute displacement  $D_a$  of channel 21 between flexion and  
273 extension in the space,

274 then the calculated displacement is  $D_{ce} - D_{cf} + D_a = 1/2 IED_{17-13}(30^\circ) + IED_{13-9}(30^\circ) + IED_{9-5}(30^\circ) + 1/2 IED_{5-1}(30^\circ) + D_a$ ;

276 the realistic displacement is  $D_{re} - D_{rf} + D_a = 1/2 IED_{17-13}(0^\circ) + IED_{13-9}(0^\circ) + IED_{9-5}(0^\circ) + 1/2 IED_{5-1}(0^\circ) + D_a$ ;

278 The reason we choose distance between junction and channel 21 instead of channel 1  
279 is that we found  $D_a(21) \approx 0$  mm, while  $D_a(1) \approx 40$  mm.

280 Calculating from the muscle end can therefore reduce the effect of significant skin  
281 distortion.

282

283 Therefore, the computed displacement is 45 millimeters, but the real displacement is  
284 50.5 millimeters. The inaccuracy is roughly 10%, which is deemed acceptable.  
285 We did not see evident skin deformation between flexion and extension for Achilles  
286 tendon identification, hence that we chose not to include this component in that  
287 application.

288

289 Subject No.1's body fat percentage is roughly 20%, thus we don't observe many skin  
290 deformations. Nevertheless, for persons with a body fat content of less than 15% or  
291 even 10%, skin deformation can produce significant changes in IEDs and a higher risk  
292 of non-conformal electrodes peeling off. In such instance, the stretchable electrode  
293 array is more helpful and relevant, but it works best when combined with a strain  
294 sensor on the patch to monitor and reduce the influence of skin deformation.  
295 Similarly, we do not think these solutions should be discussed in this document to  
296 ensure this manuscript is not too disorganized.

297

298 *5. For Figure 4g, we agree that decreasing median frequencies indicated fatigue of*  
299 *the muscle. However, the authors claimed the decreasing value of slopes of median*  
300 *frequencies indicated the fact that muscle became more fatigued. If so, the slopes of*  
301 *median frequencies during each task (30 s) should not be a constant since the muscle*  
302 *is getting fatigued as the time goes. Please have a check and related reference are*  
303 *needed.*

304 **Our response:** We appreciate the reviewer bringing up the problem of fatigue. True,  
305 the slope of median frequency does not remain constant during a task, especially if the  
306 task duration is long. As time passes, the median frequency decline will be slower  
307 because the source of tiredness is a reduction in the number of available motor units  
308 to be innervated. We can see that the exponential regression may very well match the  
309 median frequency reduction (See Fig. 5 of Ref. 5). The primary decline of median  
310 frequency occurs in the 30s after the task starts. The issue is that utilizing the  
311 exponential regression approach makes it difficult to compare each fatigue phase  
312 quantitatively, but using linear fitting to get slope values allows us to do so. In fact,  
313 using slope value is a common strategy to research muscle fatigue (Ref. 6).  
314 In part 3.4 of Ref. 6, you can also see that the slopes of median frequency are lower  
315 with increasing percentage of MVC, which corresponds to our statement in the  
316 original manuscript that ‘the decreasing value of slopes recorded by TPP electrodes

317 also matched the fact that muscle became more fatigued after each task.’ Thanks to  
318 the research mentioned by Reviewer 2, we can improve our new experiment design by  
319 isolating the first 25 seconds of each task to undertake linear fitting to decrease error  
320 as much as feasible. We appreciate the reviewer's thoughtful and considerate  
321 comments, which will be extremely valuable for this work and future study.

322

323 See page 14: ‘To assess the ability of TPP electrodes to obtain information of  
324 frequency in the signal, Ag/AgCl and TPP electrodes were set on the same position on  
325 FCU, and the subject was asked to curl the wrist with a 5 kg dumbbell for three long  
326 periods to activate FCU (Fig. 4e). The TPP electrodes showed a little better SNR than  
327 the Ag/AgCl electrodes that they are 39.2, 37.5 and 40.5 dB for three contractions  
328 recorded by TPP electrodes and 38.9, 37.5 and 38.6 dB by Ag/AgCl electrodes. The  
329 spectrograms showed TPP electrodes can give clear frequency information just like  
330 Ag/AgCl electrodes (Fig. 4f). To compare the performances of Ag/AgCl and TPP  
331 electrodes on fatigue measurement, the subject was asked to curl the wrist 60 s for  
332 three times for each type of electrodes. Three tasks were named as flexion 1, 2 and 3  
333 to calculate median frequency during each task (Fig. 4g). Linear fittings were made  
334 for first 25 s of each contraction, to quantify the outcome with less errors<sup>73</sup>. The  
335 slopes obtained by two types of electrodes both showed negative which indicated the  
336 muscle was in fatigue. This test proved the TPP electrodes can measure the muscle  
337 fatigue the same as Ag/AgCl electrodes.’

338

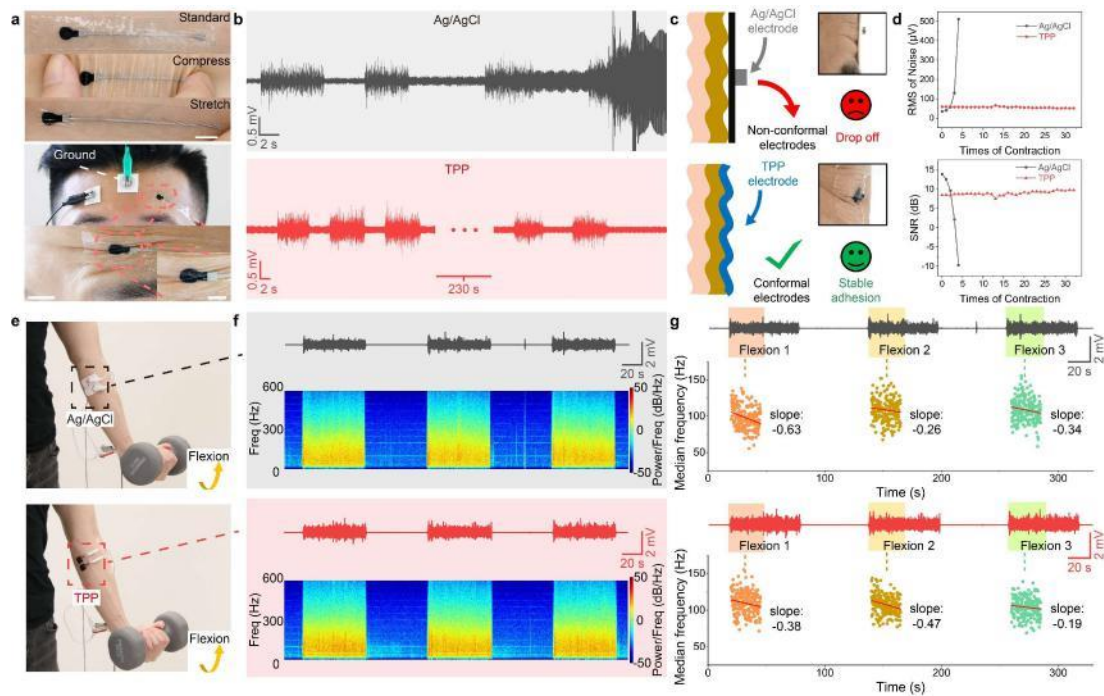

339

340 **Fig. 4 Comparison of recording performances on skin between Ag/AgCl and TPP**  
 341 **electrodes.**

342 **a** Up, standard, compressing and stretching TPP electrodes on the skin. Scale bar: 1 cm;  
 343 bottom, photographs of Ag/AgCl and TPP electrodes when recording sEMG of frontalis  
 344 and the TPP electrode in the skin folds. Scale bar of photo at the bottom: 1 cm; bottom  
 345 inset: 0.5 cm.

346 **b** sEMG signals recorded by Ag/AgCl and TPP electrodes, respectively. The subject  
 347 was asked to make each contraction for 5 seconds. In the case of recording by Ag/AgCl  
 348 electrodes, after four times of contraction, noises were even higher than signals.

349 **c** Schematic illustrations and lateral photos of Ag/AgCl electrode and TPP electrode on  
 350 skin folds.

351 **d** Noise level and SNR recorded by two electrodes during contractions.

352 **e** Photographs of electrode configuration on FCU and contraction task. Two pairs of  
 353 electrodes were attached the same position on the forearm.

354 **f** sEMG signals and spectrograms recorded by Ag/AgCl and TPP electrodes  
 355 respectively.

356 **g** sEMG signals and fitting results of median frequency during flexion 1, 2 and 3  
 357 recorded by Ag/AgCl and TPP electrodes. Decreasing median frequencies indicated

358 fatigue of the muscle.

359

360

361 *6. As shown in Figure 3d, TPP electrodes can work superbly with SNR level above 20*  
362 *dB for almost 5 days, and then get worse. Please give the reason that decreases the*  
363 *SNR of PPT electrodes for long-term measurement up to 5 days.*

364 **Our response:** The drop in SNR (caused by an increase in baseline noise level) of  
365 commercial Ag/AgCl electrodes is caused by desiccation of conductive gels between  
366 electrodes and skin. Many factors may contribute to a rise in baseline noise level in  
367 TPP electrodes. We hypothesize that perspiration in normal life might gradually  
368 destroy TPP electrodes because sweat fat and salts cannot escape and only slowly  
369 accumulate on the TPP film. These interface changes can change the effective contact  
370 area and conductivity of the film, increasing the noise intensity. Moreover, the  
371 increase of the thickness of stratum corneum because of normal metabolism may  
372 increase the impedance between electrodes and skin during such an extended period  
373 of measurement. Nonetheless, TPP electrodes have been shown to have a  
374 substantially longer effective use period than commercial gel electrodes.

375

376 See page 11: *'As for the increase of baseline noise, we hypothesize that perspiration in*  
377 *normal life might gradually the effective contact area and conductivity of the TPP*  
378 *film because sweat fat and salts can only slowly accumulate on the TPP film,*  
379 *increasing the noise intensity<sup>68</sup>. Moreover, the formation increase of the thickness of*  
380 *stratum corneum because of normal metabolism may increase the impedance between*  
381 *electrodes and skin during such an extended period of measurement.'*

382

383 *7. How about the adhesion, skin-electrode impedance and SNR of the sEMG electrode*  
384 *array patch on the skin when after, e.g., 200 times, movements (compress or stretch)?*

385 **Our response:**

386 In response to this comment, we performed three tests to examine the change in  
387 adhesion, impedance, and SNR after 200 times of compression or stretching. We  
388 physically squeezed and stretched the skin with our fingertips to make the results  
389 more convincing.

390

391 See page 8: 'Further, we found TPP electrodes showed excellent stability in adhesion,  
392 skin-electrode impedance and SNR after 200 times of compress or stretch on the skin  
393 (Supplementary Fig. 11, 12).'

394

395

396

397

398 **Supplementary Fig. 11 The change in adherence and impedance of TPP**  
399 **electrodes on the skin.**

400 **a, b** images of the electrode applied to the skin and the motions made during the  
401 adhesion test.

402 **c** The peeling force of TPP electrodes off the skin before and after motions.

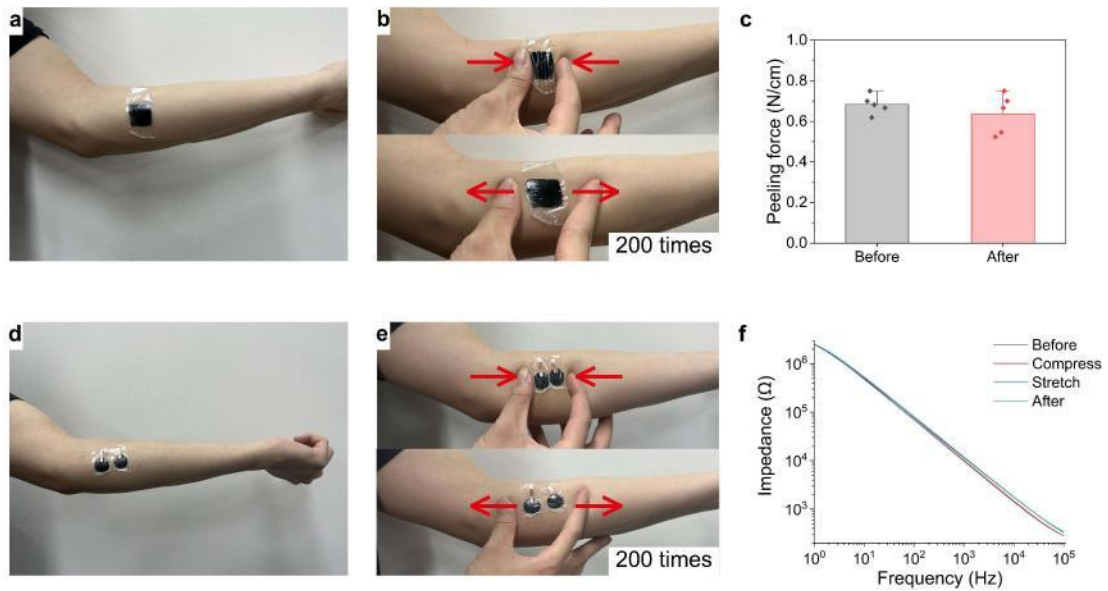

403 **d, e** Images of the electrode applied on the skin and the process of movements during  
404 impedance test.

405 **f** The impedance of TPP electrodes on the skin before, after motions and in the state  
406 of compressing and stretching.

407



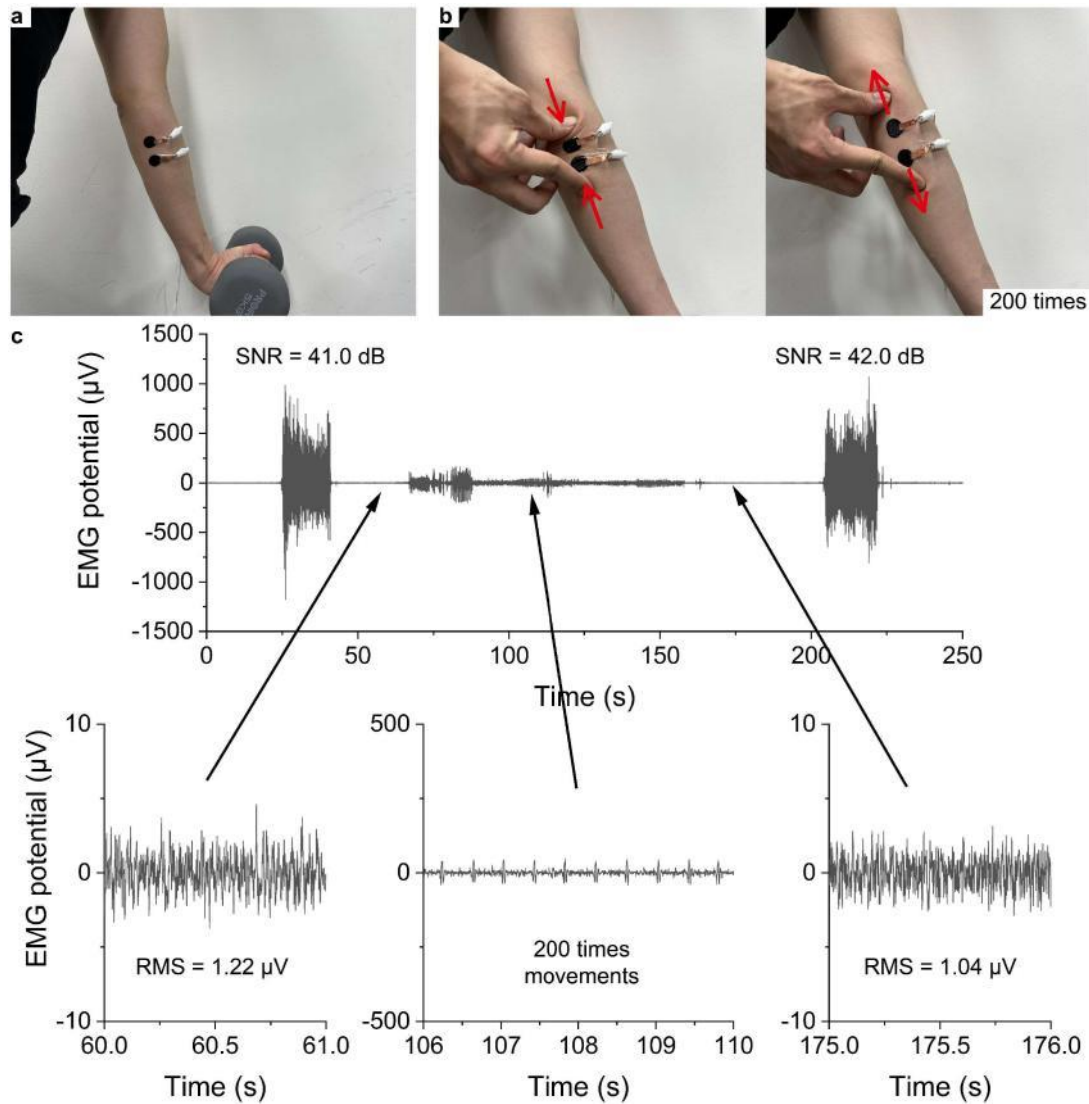

409

410 **Supplementary Fig. 12 SNR variation and baseline noise levels of TPP electrodes**  
 411 **on the skin.**

412 **a, b** Images showing the electrode applied to the skin and the motions made to  
 413 compare SNR.

414 **c** Demonstration of the entire process of recording using the TPP electrodes applied  
 415 on skin before and after motions. The baseline noise level was reduced to 1.04 μV  
 416 from 1.22 μV which was stable even after the motions. As a result, there was little  
 417 change in the SNR of signals, showing the stability of TPP electrodes on the skin even  
 418 after compression or stretching.

419

420 *8. Could be the sEMG electrode array patch be used repetitively?*

421 **Our response:** Using our TPP electrodes on the skin, we repeatedly performed  
422 peeling-attaching studies and analyzed the noise of baseline to address this remark.  
423 Even after 10 repetitions, the noise level barely changed. PPA layer on substrate may  
424 also withstand several peelings and maintain enough adhesive force (Ref. 7). Hence,  
425 we think the sEMG electrode array patch can be reapplied repeatedly.

426

427 See page 8: ‘TPP electrodes can also be used repetitively without changing the  
428 baseline noise (Supplementary Fig.13).’

429

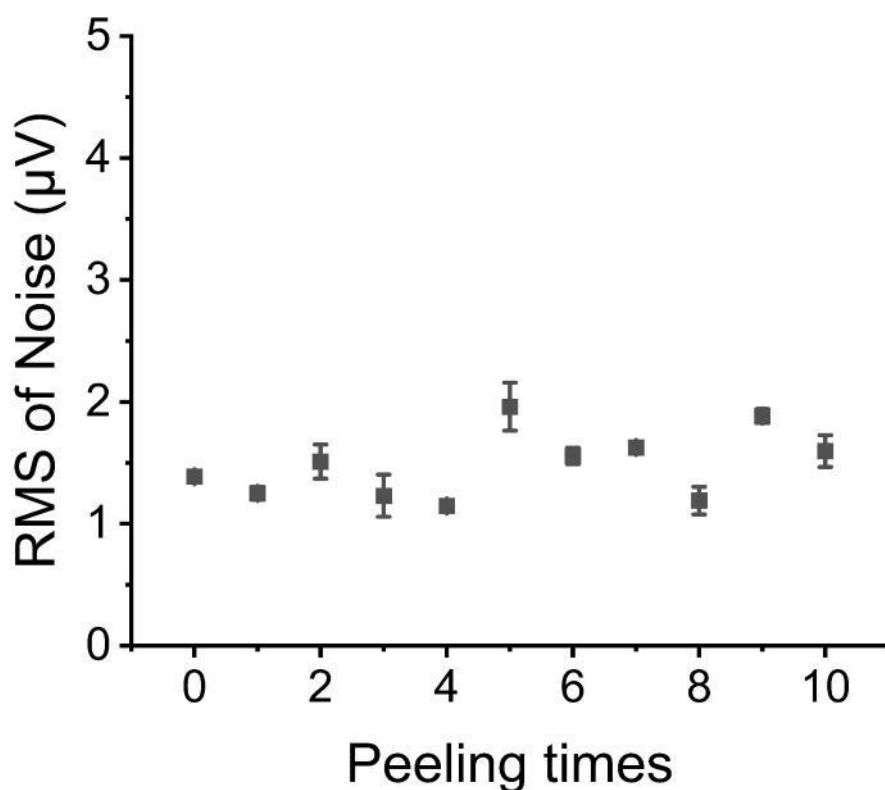

430

431 **Supplementary Fig. 13 The repetitive test of TPP films on the skin.**

432

433 *9. Please specific the thickness of each layer of the sEMG electrode array patch.*

434 **Our response:** We added the following sentence to The fabrication of MEAP.

435 See page 31: ‘The thickness of MEAPs was lower than 100 µm, typically with the  
436 substrate of 65 µm, the encapsulation layer of 25 µm and the TPP electrode of 30 µm.’

437

438 *10. Bipolar recording was used for single-channel TPP electrode (Figure 4e) and  
439 unipolar recording was used for MEAP, why and what’s the different?*

440 **Our response:** Bipolar recording can raise the SNR level to provide clearer  
441 recordings by reducing shared noise between two electrodes. As the bipolar (single  
442 differential) design is the one that is most commonly used in the EMG area, we  
443 employed this mode for single-channel TPP electrodes to permit a direct comparison  
444 with commercial Ag/AgCl electrodes. The SNR of monopolar recording is decreased  
445 for applications employing MEAP, but it is still adequate for us to investigate  
446 information about several muscles. In order to provide more convincing spatial  
447 information, we thus create monopolar recordings to reduce the effects between each  
448 electrode. This was covered in question 4 above.

449

450 We thank the reviewer again, for the thorough review and thoughtful advice. We  
451 appreciated this precious opportunity to revise the manuscript according to the  
452 reviewer's suggestions, which are extremely valuable to the improvement of our  
453 manuscript.

454

455 *Reference*

456 [1]. Cao, J. et al. Stretchable and Self-Adhesive PEDOT:PSS Blend with High Sweat  
457 Tolerance as Conformal Biopotential Dry Electrodes. *ACS Appl. Mater. Interfaces*  
458 14, 39159–39171 (2022).

459 [2]. Farina D, Madeleine P, Graven-Nielsen T, et al. Standardising surface  
460 electromyogram recordings for assessment of activity and fatigue in the human upper  
461 trapezius muscle[J]. *European journal of applied physiology*, 2002, 86(6): 469-478.

462 [3]. Beretta Piccoli M, Rainoldi A, Heitz C, et al. Innervation zone locations in 43  
463 superficial muscles: toward a standardization of electrode positioning[J]. *Muscle &*  
464 *nerve*, 2014, 49(3): 413-421.

465

466 Reference for the response to the Reviewer #2

467 [1]. Cao, J. et al. Stretchable and Self-Adhesive PEDOT:PSS Blend with High Sweat  
468 Tolerance as Conformal Biopotential Dry Electrodes. *ACS Appl. Mater. Interfaces*  
469 14, 39159–39171 (2022).

470 [2]. Farina D, Madeleine P, Graven-Nielsen T, et al. Standardising surface  
471 electromyogram recordings for assessment of activity and fatigue in the human upper  
472 trapezius muscle[J]. *European journal of applied physiology*, 2002, 86(6): 469-478.

473 [3]. Beretta Piccoli M, Rainoldi A, Heitz C, et al. Innervation zone locations in 43  
474 superficial muscles: toward a standardization of electrode positioning[J]. *Muscle &*  
475 *nerve*, 2014, 49(3): 413-421.

476 [4] Merletti, R. & Muceli, S. Tutorial. Surface EMG detection in space and time: Best  
477 practices. *J. Electromyogr. Kinesiol.* 49, 102363 (2019).

478 [5] Merletti, R. & Roy, S. Myoelectric and mechanical manifestations of muscle fatigue in  
479 voluntary contractions. *J. Orthop. Sports Phys. Ther.* **24**, 342–353 (1996).

480 [6] Oliveira, A. de S. C. & Gonçalves, M. EMG amplitude and frequency parameters of  
481 muscular activity: Effect of resistance training based on electromyographic fatigue threshold.  
482 *J. Electromyogr. Kinesiol.* **19**, 295–303 (2009).

483 [7] Cheng, J. et al. Wet-Adhesive Elastomer for Liquid Metal-Based Conformal Epidermal  
484 Electronics. *Adv. Funct. Mater.* 2200444 (2022) doi:10.1002/adfm.202200444.

485

486 **Reviewer #3 (Remarks to the Author):**

487

488 *The manuscript describes a surface electromyography electrode, which is novel, as*  
 489 *the authors state, because it is characterised by the fact that it adheres adhesively to*  
 490 *the skin surface, is stretchable and forms an array (see abstract). This claim by itself*  
 491 *shows that the authors seem to be unfamiliar with the state-of-the-art in surface*  
 492 *electromyography (sEMG). Adhesive sEMG electrodes that adhere independently to*  
 493 *the surface of the skin have been available for several years. The manuscript does not*  
 494 *comment on this, nor does it compare the supposedly so good new electrode with it.*

495 **Our response:** We appreciate the reviewer looking through our text and bringing up  
 496 any issues. We consistently study the state-of-the-art in the sEMG area in order to  
 497 evaluate the uniqueness of our work objectively. The TPP electrodes were compared  
 498 with other good new electrodes, and it was mentioned on page 9: ‘In comparison with  
 499 dry electrodes in reported literatures<sup>59–67</sup>, TPP electrode performs better when the  
 500 conformability and signal quality are evaluated (Fig. 2l, Supplementary Table 1, 2).’

501

502 **Supplementary Table 1 Comparisons between dry electrodes in other literatures and this**  
 503 **work.**

|                  | Materials for electrodes                                    | Materials for substrates | Is it intrinsically stretchable? | Strain      | The adhesiveness of electrode (N/cm) | The smallest area of the electrode (mm <sup>2</sup> ) | Electrode-skin impedance at 100 Hz (KΩ*cm <sup>2</sup> ) | Long-term test (Hour) | RM S of Noise (μV) | Signal-to-noise ratio (dB) | Reference |
|------------------|-------------------------------------------------------------|--------------------------|----------------------------------|-------------|--------------------------------------|-------------------------------------------------------|----------------------------------------------------------|-----------------------|--------------------|----------------------------|-----------|
|                  | Ag                                                          | Polyimide                | No                               | 80%         | 0                                    | 16.0                                                  | 12.8                                                     | 11                    | N/A                | N/A                        | 1         |
|                  | Ag-filled epoxy                                             | Epoxy                    | No                               | N/A         | 0                                    | 100.0                                                 | 80.0                                                     | 24                    | ~43.0              | 16.0                       | 2         |
|                  | Ag flakes/PDMS                                              | PDMS                     | Yes                              | 480%        | 0                                    | 100.0                                                 | 34.0                                                     | 10                    | ~540.0             | N/A                        | 3         |
|                  | Ag-polytetrafluoroethylene                                  | Polyurethane             | Yes                              | 20%         | 0                                    | 600.0                                                 | N/A                                                      | N/A                   | ~74.0              | N/A                        | 4         |
|                  | Au nanoparticles                                            | Polyimide                | No                               | N/A         | 0                                    | 80.0                                                  | N/A                                                      | 24                    | ~60.0              | ~21.0                      | 5         |
|                  | PEDOT:PSS/Glycerol                                          | Silk fiber               | Yes                              | 250%        | N/A                                  | 314.0                                                 | ~157.0                                                   | N/A                   | N/A                | N/A                        | 6         |
|                  | PEDOT:PSS/Glycerol/Polysorbate                              | N/A                      | Yes                              | 100%        | 0.013                                | 100.0                                                 | 200.0                                                    | 12                    | N/A                | 35.2                       | 7         |
|                  | PEDOT:PSS/Polylactic acid                                   | N/A                      | No                               | 34%         | ~0.467                               | 176.6                                                 | ~35.3                                                    | N/A                   | ~47.0              | 22.8                       | 8         |
|                  | PEDOT:PSS/Poly(poly(ethylene glycol) methyl ether acrylate) | N/A                      | Yes                              | 75%         | 0.005                                | 400.0                                                 | N/A                                                      | N/A                   | ~60.6              | 4.5                        | 9         |
|                  | PEDOT:PSS/Polyvinyl alcohol/Borax                           | N/A                      | Yes                              | 400%        | N/A                                  | 254.3                                                 | 101.7                                                    | N/A                   | N/A                | 29.5±1.3                   | 10        |
|                  | WPU/Deep eutectic solvent/Tannic acid                       | N/A                      | Yes                              | 178%        | 0.125                                | 1256.0                                                | 25                                                       | N/A                   | 50.0               | ~14.0                      | 11        |
|                  | PEDOT/Waterborne polyurethane/D-sorbitol                    | N/A                      | Yes                              | 43%         | 0.43                                 | 400                                                   | 15                                                       | 16                    | ~25                | ~20                        | 12        |
|                  | PEDOT/Polyvinyl alcohol/Tannic Acid                         | N/A                      | Yes                              | 54%         | 0.28                                 | 16                                                    | 100                                                      | N/A                   | 11.8               | 34.96                      | 13        |
| <b>This work</b> | <b>PEDOT/Polyvinyl alcohol/Tannic Acid/Liquid metal</b>     | <b>PDMS</b>              | <b>Yes</b>                       | <b>188%</b> | <b>0.58</b>                          | <b>0.8</b>                                            | <b>80</b>                                                | <b>120</b>            | <b>1.0</b>         | <b>42.3±0.7</b>            |           |

504 One of these works was published in the year 2020, nine in 2021, and three in 2022.

505 We believe that this comparison accurately captures the current state-of-the-art in  
 506 sEMG electrode technology. Just 6 out of 13 studies discuss sticky electrodes, and our  
 507 TPP electrodes perform the best in terms of adhesiveness, which is important to note.  
 508 TPP also fared the best in terms of long-term usage and signal quality. Our claim that  
 509 our TPP electrodes are currently state-of-the-art is supported by this comparison.

510 Nevertheless, none of these electrodes could be used to create a stretchable array,  
511 which drastically limited the number of applications that could be used in the sEMG  
512 sector. In order to evaluate the effectiveness of our work objectively, we also  
513 compared the performance of MEAP and other sEMG arrays. That part will be  
514 discussed later for another concern about electrode arrays from the reviewer.  
515 But we think the lack of detailed comparisons was the main reason for the concern  
516 from the reviewer, so we added description about the comparison with other dry  
517 electrodes.

518

519 See page 9: *'In the comparison, we also found only 6 out of 13 studies discussed*  
520 *sticky electrodes, and our TPP electrodes perform the best in terms of adhesiveness,*  
521 *which is an important contribution to its highest SNR among all dry electrodes.'*

522

523 *Instead, an unspecified Ag/AgCl electrode is used for comparison, which, as can be*  
524 *seen from the figures, does not correspond to the standard for sEMG electrodes. It is*  
525 *therefore doubtful to what the electrode introduced in the manuscript is compared to*  
526 *and how meaningful this comparison is.*

527 **Our response:** We thank the reviewer for seeking clarification. We checked our  
528 manuscript and found the details about the Ag/AgCl electrode was only mentioned in  
529 the 'MATERIALS AND METHODS -- Impedance measurement'. The Ag/AgCl  
530 electrode (Foam Monitoring Electrode 2228, 3M, USA) we used is a standard sEMG  
531 electrode, and it has previously been reported in many articles by other researchers  
532 (Ref. 14-18). So we believe all our comparisons are reliable and convincing. But we  
533 also found the use of 2228 electrodes for sEMG just started in recent years, which  
534 might not be recognized by the sEMG field. We took the advice from the reviewer  
535 and bought Red Dot 2223 electrode from 3M for our experiments. 2223 electrodes  
536 were used in literature far longer, so we think the results should be trustworthy (Ref.  
537 19-25). This part will also be discussed below for another concern from the reviewer.

538

539 To make the experimental details clearer, we added details in 'MATERIALS AND  
540 METHODS -- sEMG signal recording'.

541

542 See page 34: ‘Foam Monitoring 2228 electrodes were used for long-term test,  
543 flexibility test on the forehead, and Red Dot 2223 (USA, 3M) electrodes were used  
544 for fatigue tests.’

545

546 *Electrode arrays that adhere to the skin surface for long periods of time have also*  
547 *been described since the 1990s and are now commercially available. There is no*  
548 *reference to this in the manuscript either, nor is the introduced electrode compared to*  
549 *them.*

550 **Our response:** We agree with the reviewer that this comparison between commercial  
551 array (CA) and our MEAP is necessary. The material for the most popular  
552 commercial sEMG array currently available is polyimide (PI), which has the Young's  
553 modulus of 3 Gpa. Due to its characteristics, it was found that unless specific features,  
554 such as serpentine design, were introduced, the array with PI substrate cannot make a  
555 fully conformal contact with human skin (Young's modulus of 10 kPa). Also, we  
556 recorded two movies to contrast the contact effectiveness of the PI sEMG array and  
557 the MEAP on the skin (see Supplementary Video 2 and 3). Commercial array came  
558 off either on the muscle or muscle-tendon junction during the muscle action, yet the  
559 MEAP always maintained perfectly conformal contact. We also conducted sEMG  
560 recording by CA and MEAP and added the results in the manuscript.

561

562 See page 16: ‘**Comparison between MEAP and commercial sEMG array**  
563 **Electrode arrays which adhere to the skin have been developed and used in laboratory**  
564 **settings. The material for the most popular sEMG commercial array (CA) currently**  
565 **available is polyimide (PI), which has the Young's modulus of 3 GPa. Due to its**  
566 **characteristics, it was found that unless specific features, such as serpentine design,**  
567 **were introduced, the array with PI substrate cannot make a fully conformal contact**  
568 **with human skin (Young's modulus of 10 kPa). We recorded a movie to contrast the**  
569 **contact effectiveness of the PI sEMG commercial array and the MEAP on the biceps**  
570 **brachii (Fig. 5a, Supplementary Video 2). CA formed gaps between itself and the skin**  
571 **during the muscle action, yet the MEAP always maintained great contact, even though**  
572 **their thicknesses are both 100  $\mu\text{m}$ . The differences in attachment performance were**  
573 **reflected directly in the sEMG signals. When CA was applied to the muscle, the poor**  
574 **attachment caused gaps between electrodes and the skin after the muscle contractions,**  
575 **resulting in the increase in baseline noise during the rest stage, which would lower the**

576 SNR level (Fig. 5b). To demonstrate the effect of skin deformation on the recording  
577 performance, we calculated the SNR of the first and the last contractions. We  
578 recorded and displayed the SNR of each channel, and none of the CA electrodes  
579 provided SNR greater than 20 dB with the last contraction, whereas all MEAP  
580 channels provided SNR greater than 20 dB for both the first and last contractions (Fig.  
581 5c). We believe that the conformal attachment is the determining factor in this  
582 because the SNR of the first contraction recorded by CA was adequate but  
583 significantly worsened for the last contraction. We also employed statistical analysis  
584 to quantify these outcomes (Fig. 5d). Because of the mismatch between CA and the  
585 skin, the baseline noise level of all CA electrodes rose distinctly after only one  
586 contraction. After reattachment, the baseline noise was lowered, indicating again that  
587 the mismatch between CA and skin is the cause for change. Most CA channels  
588 showed more than two-fold change in baseline noise, resulting in a significantly lower  
589 SNR. While the MEAP exhibited a much more stable noise level even after five  
590 contractions, maintaining a high SNR. We also recorded sEMG signals from muscle-  
591 tendon junctions (closer to the distal end of the biceps) with both arrays, where skin  
592 deformation was greater (Fig. 5e, Supplementary Video 3). It can be seen that the  
593 mismatch between CA and skin was significant, while the MEAP still kept perfectly  
594 conformal contact. The sEMG signals also revealed a drop-off of signal from some  
595 electrodes of CA (Fig. 5f). Recordings from the CA channels on muscle-tendon  
596 junction were significantly damaged by muscle contractions, because SNR of most  
597 channels decreased from the first contraction to the last one (Fig. 5g). MEAP on the  
598 other hand, produced stable recordings with all channels having SNR greater than 20  
599 dB. Statistical analysis of sEMG data from CA on the distal end produced similarly  
600 unsatisfactory results, but it is worth noting that MEAPs always kept stable and  
601 excellent recording even after ten muscle contractions (Fig. 5h). These results suggest  
602 that the MEAP can record better sEMG signals than CA because of the better contact  
603 even with large skin deformation.



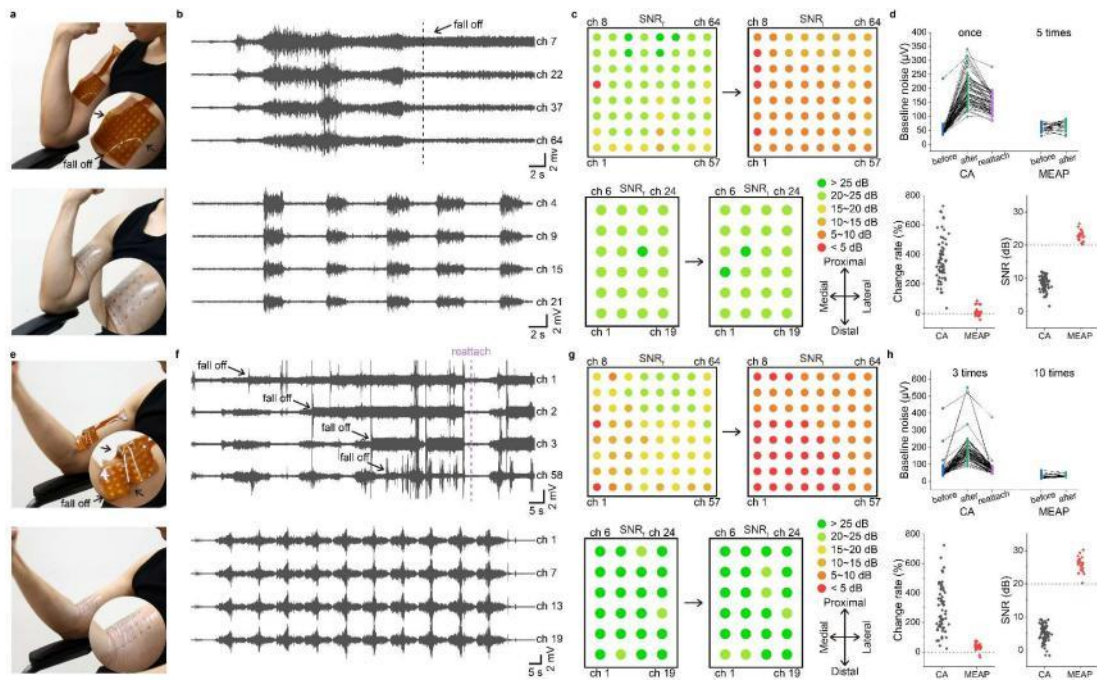

605

606 **Fig. 5 The comparison of attachment performances between commercial array**  
 607 **and MEAP.**

608 **a, e** Photographs of CA and MEAP attachment, illustrating the difference when  
 609 recording from muscle and muscle-tendon junction of biceps brachii.

610 **b, f** sEMG signals recorded using CA and MEAP on muscle and muscle-tendon  
 611 junction of biceps brachii. Four typical channels were picked for each recording.

612 **c, g** Spatial SNR performance map for each channel of CA and MEAP for the first  
 613 and last muscle contraction. SNR<sub>1</sub>: SNR of the first contraction; SNR<sub>n</sub>: SNR of the last  
 614 contraction.

615 **d, h** Statistical analysis of performances between CA and MEAP, including baseline  
 616 noise level of CA before and after one or three muscle contractions, as well as after  
 617 reattachment; baseline noise level of MEAP before and after five or ten muscle  
 618 contractions; baseline noise change rates before and after muscle contractions; SNR  
 619 performance of the last muscle contraction recorded by each of the CA and MEAP  
 620 channels.'

621

622 See page 4: 'Based on MPC circuit, a multi-channel sEMG metal-polymer electrode  
 623 array patch is fabricated to achieve high-quality and high-density sEMG signals for  
 624 monitoring of muscle loading and muscle fatigue, whose performance is more stable  
 625 than commercial sEMG array.'

626 See page 34: ‘The commercial array has 64 channels Ag/AgCl electrodes on a  
 627 polyimide substrate with thickness of 100  $\mu\text{m}$  (Neuracle, China). The conductive gel  
 628 g.GAMMAgel (G.tec, Austria) was used between commercial array and the skin.’

629

630 We can see MEAP performs better than commercial arrays since a good contact is a  
 631 crucial need for dependable and steady recording. We also compared flexible arrays  
 632 described in the literature in Supplemental Table 2 of the original manuscript.

633

634

635 **Supplementary Table 2 Comparisons between sEMG arrays in other literatures and this**  
 636 **work.**

| Materials electrodes      | for | Materials substrates                                    | for | Is it intrinsically stretchable? | Strain      | The adhesiveness of electrode (N/cm) | The number of channels      | Success rate of channels | The smallest area of the electrode ( $\text{mm}^2$ ) | Electrode-skin impedance at 100 Hz ( $\text{K}\Omega\cdot\text{cm}^2$ ) | Long-term test (Hour) | RMS of Noise ( $\mu\text{V}$ ) | Signal-to-noise ratio (dB)     | Reference |
|---------------------------|-----|---------------------------------------------------------|-----|----------------------------------|-------------|--------------------------------------|-----------------------------|--------------------------|------------------------------------------------------|-------------------------------------------------------------------------|-----------------------|--------------------------------|--------------------------------|-----------|
| Ag/AgCl ink               |     | Polypropylene                                           |     | No                               | N/A         | 0                                    | 16                          | N/A                      | 5.1                                                  | 5000.0                                                                  | N/A                   | N/A                            | ~24.0                          | 26        |
| Ag/AgCl ink               |     | Polyethylene terephthalate                              |     | No                               | N/A         | 0                                    | 64                          | 100%                     | 14.5                                                 | N/A                                                                     | 2                     | N/A                            | ~20.0                          | 27        |
| Ag flakes/PDMS            |     | PDMS                                                    |     | Yes                              | 30%         | 0                                    | 8                           | 100%                     | 26.4                                                 | 33.0                                                                    | N/A                   | N/A                            | 29.5                           | 28        |
| Ag nanowires              |     | PDMS                                                    |     | Yes                              | 50%         | 0                                    | 18                          | 94.4%                    | 9.6                                                  | N/A                                                                     | N/A                   | N/A                            | N/A                            | 29        |
| Ag nanowires              |     | Thermoplastic polyurethane                              |     | Yes                              | 600%        | 0                                    | 4                           | 100%                     | 201.0                                                | 1004.8                                                                  | N/A                   | ~34.0                          | 26.6                           | 30        |
| Al                        |     | Polyethylene terephthalate                              |     | No                               | 51%         | 0                                    | 16                          | 100%                     | 84.0                                                 | 84.0                                                                    | N/A                   | ~130.0                         | N/A                            | 31        |
| Au                        |     | Polyimide                                               |     | No                               | 40%         | 0                                    | 20                          | N/A                      | N/A                                                  | N/A                                                                     | N/A                   | ~300.0                         | ~20.0                          | 32        |
| Au                        |     | Polyimide                                               |     | No                               | 37%         | 0                                    | 64                          | N/A                      | 0.8                                                  | 117.0                                                                   | N/A                   | ~10.0                          | 40.0 $\pm$ 8.0                 | 33        |
| Au                        |     | Polyimide                                               |     | No                               | N/A         | 0                                    | 64                          | N/A                      | 3.1                                                  | N/A                                                                     | N/A                   | N/A                            | 26.0 $\pm$ 6.0                 | 33        |
| Carbon/Silicone rubber    |     | Textile                                                 |     | N/A                              | N/A         | 0                                    | 14                          | 100%                     | 400.0                                                | 320.0                                                                   | N/A                   | ~100.0                         | 12.8 $\pm$ 0.9                 | 34        |
| MXene                     |     | PDMS                                                    |     | No                               | N/A         | 0                                    | 40                          | 100%                     | 7.1                                                  | 2.4                                                                     | N/A                   | ~34.0                          | N/A                            | 35        |
| MXene                     |     | Parylene-C                                              |     | No                               | N/A         | 0                                    | 16                          | 81.25%                   | 2.6                                                  | 256.0                                                                   | N/A                   | ~118.0                         | 24.4 $\pm$ 1.7                 | 36        |
| PEDOT:PSS/Choline lactate |     | Kapton                                                  |     | No                               | N/A         | 0                                    | 16                          | 100%                     | 2.6                                                  | 45.0                                                                    | N/A                   | ~40.0                          | 15.6                           | 37        |
| Stainless steel           |     | Textile                                                 |     | No                               | N/A         | 0                                    | 150                         | 90.6%                    | 113.0                                                | N/A                                                                     | N/A                   | 50.6 $\pm$ 14.8                | 30.8 $\pm$ 2.4                 | 38        |
| <b>This work</b>          |     | <b>PEDOT/Polyvinyl alcohol/Tannic acid/Liquid metal</b> |     | <b>Yes</b>                       | <b>188%</b> | <b>0.58</b>                          | <b><math>\geq 24</math></b> | <b>100%</b>              | <b>0.8</b>                                           | <b>80</b>                                                               | <b>120</b>            | <b>1.0</b>                     | <b>42.3<math>\pm</math>0.7</b> |           |

637 One of these works was released in 2020, nine were released in 2021, and three were  
 638 released in 2022. We can see from this table that the only electrode having  
 639 adhesiveness is ours. Also, the patch’s 188% strain is higher than that of the majority  
 640 of prior works, further assuring conformal contact with the skin. For the lowest noise  
 641 RMS for sEMG recording by MEAP in this comparison, both adhesiveness and  
 642 stretchability are crucial. The straightforward construction and reliable operation of  
 643 MEAP allow it to be employed for a variety of muscles and situations in addition to  
 644 enhanced signal capture. Taking into account the foregoing discussion, we believe our  
 645 work to be state-of-the-art in the sEMG array sector.

646

647

648 *This leaves the property of stretchability, which according to the authors should*  
 649 *improve the quality of sEMG signals. The advantages and disadvantages of*

650 *stretchable electrode arrays have been debated among sEMG experts for many years.*  
651 *The problem is, that the interelectrode distance changes when the array is stretched.*  
652 *This affects the frequency spectrum of the sEMG signal in the case of a bipolar lead.*  
653 *Investigations in the frequency domain, as suggested by the authors for fatigue*  
654 *detection, are therefore not valid for non-isometric contractions, as it is not possible*  
655 *to exclude beyond doubt that a measured change in the frequency domain is not due*  
656 *to a change in the electrode distance. Stretchable electrode arrays are therefore*  
657 *fundamentally unsuitable for such applications.*

658 **Our response:**

659 Yes, we concur with the reviewer's worry concerning the impact of IED changes on  
660 sEMG signals. In bipolar mode of recording, it is true that changing the IED between  
661 two electrodes can produce RMS and frequency changes. But the recording setups are  
662 monopolar for most applications employing MEAP in this manuscript, including  
663 identifying muscle loading, exhaustion, and muscular activity map. Signals from each  
664 electrode are unrelated to one another. About the reviewer's concern concerning  
665 fatigue assessment for non-isometric contractions, it is claimed that a reduction in  
666 median frequency is also noticed via monopolar recording (Ref. 39). This was also  
667 seen in our trials (see Fig. 8g). The variation in slope values under varied loads  
668 revealed the muscle's various exhaustion stages. Extra figure below shows monopolar  
669 recording data from the new fatigue trial described in Fig. 4e. Even though the signals  
670 were heavily influenced by powerline noise and harmonics, the median frequencies  
671 reduced during the contraction. All of these references and demonstrations lead us to  
672 conclude that our stretchable electrode array is not only appropriate, but also offers an  
673 unrivaled advantage for such applications due to its superior attachment performance  
674 (see Supplementary Video 2 and 3).

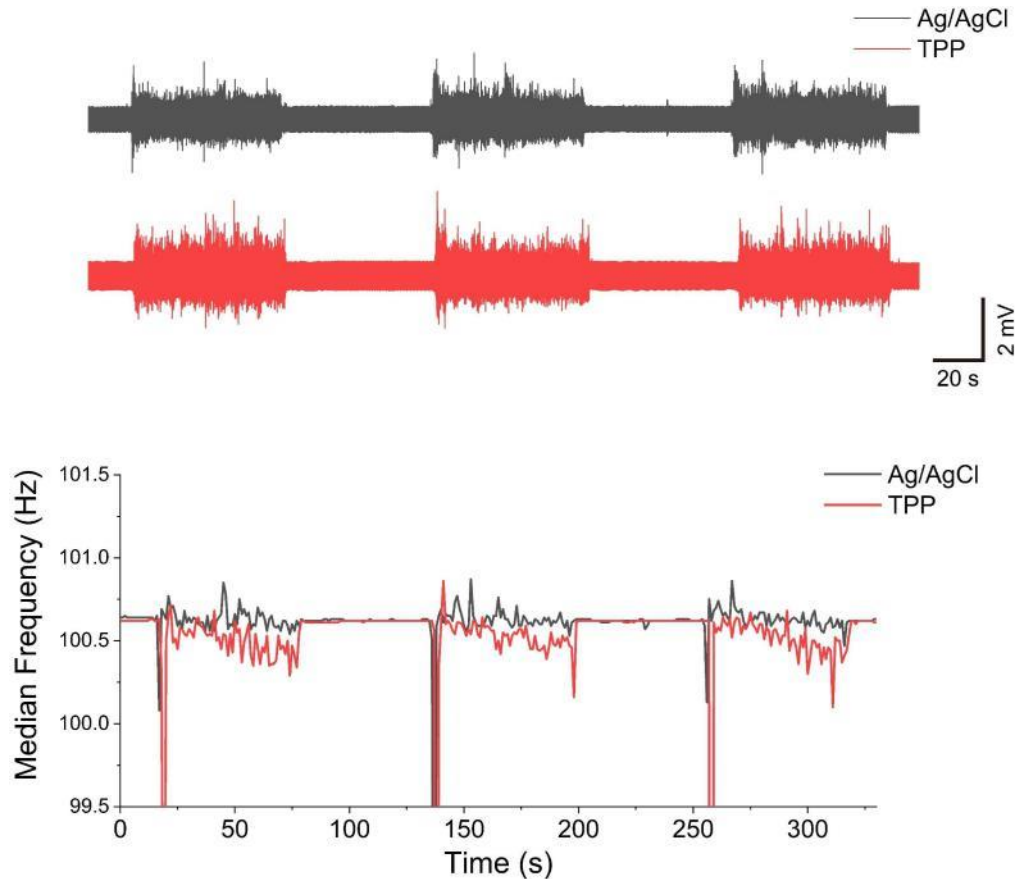

675

676 **Extra figure for reviewer 3's comment.** Red dot 2223 3M electrodes and TPP  
 677 electrodes were placed to identical positions on the FCU, and monopolar recording  
 678 mode was chosen, and the median frequency was calculated. Both electrodes recorded  
 679 decline in median frequency.

680

681 *This brings me to another problem concerning the manuscript. The manuscript is full*  
 682 *of claims - often in the superlative - about signal quality and possible applications of*  
 683 *the described electrode, which are not statistically proven. They seem to be the purely*  
 684 *subjective perceptions of the authors. This becomes particularly clear in Fig. 2 k, in*  
 685 *which a signal with a motion artefact, which occur from time to time but not*  
 686 *regularly, was compared with the signal detected with the introduced electrode. The*  
 687 *manuscript does not describe whether and if so how repeat measurements were*  
 688 *carried out and how these were statistically evaluated to substantiate the statements*  
 689 *made.*

690 **Our response:**

691 We thank the reviewer asking for clarification. The goal of Fig. 2k is to demonstrate  
 692 that adhesive TPP electrodes are superior to our non-adhesive PEDOT-PVA electrode

693 for sEMG recording. We appreciate the reviewer's worry that motion artifacts occur  
694 irregularly due to the wire-swinging effect. Nevertheless, the motion artefact in this  
695 situation is mostly created by the relative movement of electrodes on the skin during  
696 muscle movements. As can be seen in the Supplementary Fig. 8, the motion artifacts  
697 are most severe during the biceps curl, whether recorded in monopolar or bipolar  
698 mode. We also discovered that sticky TPP electrodes produce less motion artifacts  
699 than non-adhesive PEDOT-PVA electrodes. We used statistical tools to examine 5  
700 curls for each type of electrode and discovered that the RMS change differed between  
701 them, proving our claim: the adhesive TPP electrodes are more suitable for sEMG  
702 recording than our non-adhesive PEDOT-PVA electrode. About the reviewer's worry  
703 about subjective conclusions, we accept that the lack of specifics in the experimental  
704 portion contributed to this perception to some extent. Nonetheless, we need to point  
705 out that all our findings are based on the outcomes of tests or comparative studies  
706 with other publications. The SNR values in Fig. 2l were obtained from various  
707 sources and compared. In Fig. 3d, three contractions were recorded every day to  
708 provide statistical RMS and SNR values. In Fig. 8f, all RMS values collected  
709 throughout the isometric exercise were used to create a box chart. In addition, we  
710 tested three individuals in total to assess our MEAP performance on various persons  
711 for injury prevention. We always strive to make things objective by using statistical  
712 analysis of our findings.

713

714 We included information in 'sEMG signal recording' for better explanations to make  
715 things clearer.

716 See page 34 'During the biceps brachii muscle recordings, a comparative test between  
717 PEDOT-PVA and TPP electrodes was performed. The subject was instructed to keep  
718 the curl speed between flexion and extension at 4.5 rad/s. Five contractions of each  
719 electrode were tested for RMS alterations. For long-term test, three contractions were  
720 recorded each day to provide statistical RMS and SNR values.'

721

722 *Fig. 4 a and e shows another problem that arises when characterising the quality of*  
723 *the novel electrodes. The electrodes of the devices used for comparison are not*  
724 *located in the same position as the novel electrodes. Rather, the comparison signals*  
725 *are derived at less favourable positions, which has a negative influence on the signal*

726 *amplitude, the SNR and the frequency spectrum. An objective comparison between the*  
727 *two devices is not possible under these conditions.*

728 **Our response:** We appreciate the reviewer's thoughtful comment on the experiment  
729 design of this comparison test. We were also worried before that whether such  
730 position difference caused difference in signal recording. The reason we chose to  
731 record contractions by two types of electrodes simultaneously is we hope to get  
732 'identical' signals and do analysis on the fatigue which should only be influenced by  
733 the type of electrodes. We were more worried that each contraction itself would have  
734 a difference in fatigue which introduced another variable into the analysis even if the  
735 tasks were the same. So here is the issue of choice. We assumed remarkably close  
736 positions of two electrodes would not make too much difference to the signal  
737 recorded, so we chose that way originally. But we also agree with the reviewer's  
738 opinion, so we conducted this experiment again to eradicate the position effect, trying  
739 to make an objective comparison as the reviewer wished. We need to clarify that  
740 through this new test, we cannot get the same conclusion that TPP electrodes are  
741 better for fatigue measurements than Ag/AgCl electrodes, but we can say the TPP  
742 electrodes can measure the muscle fatigue just as Ag/AgCl electrodes. It is worth  
743 mentioning that we changed the Ag/AgCl electrodes from Foam Monitoring 2228 to  
744 Red Dot 2223 electrodes in the new experiments. We updated Fig. 4 with the new  
745 experiment.

746

747 See page 14: **'To assess the ability of TPP electrodes to obtain information of**  
748 **frequency in the signal, Ag/AgCl and TPP electrodes were set on the same position on**  
749 **FCU, and the subject was asked to curl the wrist with a 5 kg dumbbell for three long**  
750 **periods to activate FCU (Fig. 4e). The TPP electrodes showed a little better SNR than**  
751 **the Ag/AgCl electrodes that they are 39.2, 37.5 and 40.5 dB for three contractions**  
752 **recorded by TPP electrodes and 38.9, 37.5 and 38.6 dB by Ag/AgCl electrodes. The**  
753 **spectrograms showed TPP electrodes can give clear frequency information just like**  
754 **Ag/AgCl electrodes (Fig. 4f). To compare the performances of Ag/AgCl and TPP**  
755 **electrodes on fatigue measurement, the subject was asked to curl the wrist 60 s for**  
756 **three times for each type of electrodes. Three tasks were named as flexion 1, 2 and 3**  
757 **to calculate median frequency during each task (Fig. 4g). Linear fittings were made**  
758 **for first 25 s of each contraction, to quantify the outcome with less errors<sup>73</sup>. The**  
759 **slopes obtained by two types of electrodes both showed negative which indicated the**

760 muscle was in fatigue. This test proved the TPP electrodes can measure the muscle  
 761 fatigue the same as Ag/AgCl electrodes.'

762

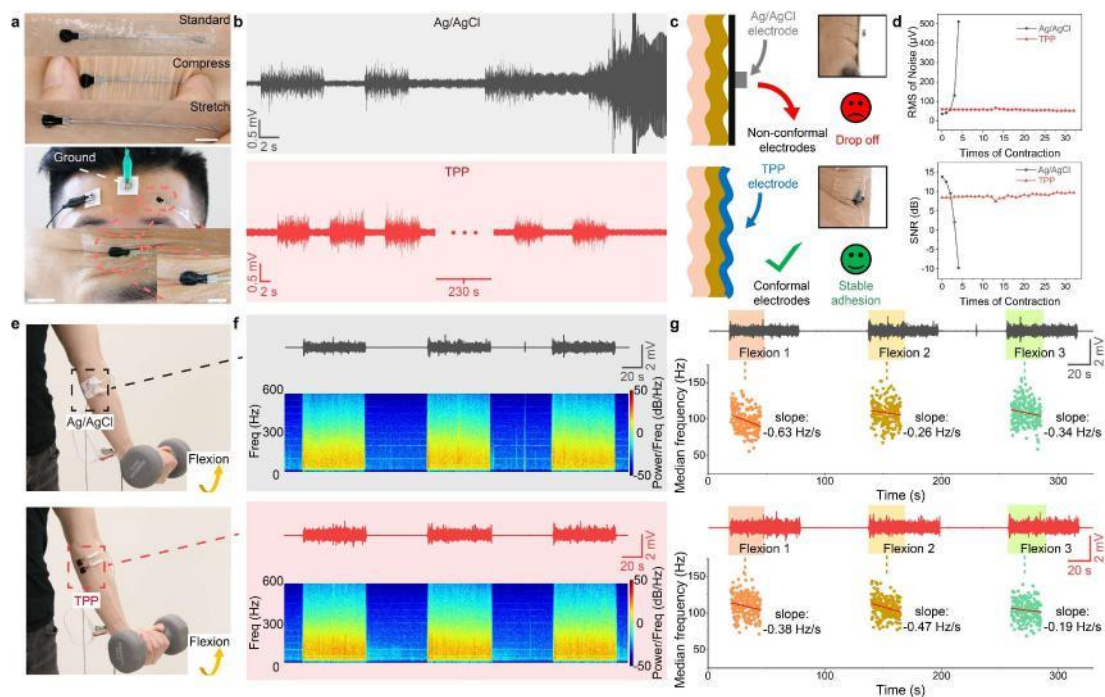

763

76

4

765

**Fig. 4 Comparison of recording performances on skin between Ag/AgCl and TPP electrodes.**

766 **a** Up, standard, compressing and stretching TPP electrodes on the skin. Scale bar: 1 cm;  
 767 bottom, photographs of Ag/AgCl and TPP electrodes when recording sEMG of frontalis  
 768 and the TPP electrode in the skin folds. Scale bar of photo at the bottom: 1 cm; bottom  
 769 inset: 0.5 cm.

770 **b** sEMG signals recorded by Ag/AgCl and TPP electrodes, respectively. The subject  
 771 was asked to make each contraction for 5 seconds. In the case of recording by Ag/AgCl  
 772 electrodes, after four times of contraction, noises were even higher than signals.

773 **c** Schematic illustrations and lateral photos of Ag/AgCl electrode and TPP electrode on  
 774 skin folds.

775 **d** Noise level and SNR recorded by two electrodes during contractions.

776 **e** Photographs of electrode configuration on FCU and contraction task. Two pairs of  
 777 electrodes were attached the same position on the forearm.

778 **f** sEMG signals and spectrograms recorded by Ag/AgCl and TPP electrodes  
 779 respectively.

780 **g** sEMG signals and fitting results of median frequency during flexion 1, 2 and 3  
 781 recorded by Ag/AgCl and TPP electrodes. Decreasing median frequencies indicated  
 782 fatigue of the muscle.

783

784

785 *Finally, a comment on electrode arrays. The use of electrode arrays has been known*  
786 *for a long time under the pseudonym High Density sEMG (HDsEMG) and is widely*  
787 *used in different research questions. The method is called sEMG imaging and the*  
788 *"heat maps" shown in Fig. 5 g and h are called "muscle activity maps" in the*  
789 *literature. The fact that HDsEMG is suitable for localising anatomical structures*  
790 *such as the neuromuscular junction or tendon insertion has been known since the*  
791 *1990s and has been studied in a number of different investigations. In connection with*  
792 *fatigue and pain, a change in the spatial distribution of the activity of the muscle has*  
793 *already been demonstrated, as well as a change in the spectrum of the signal. This*  
794 *fundamental work is not mentioned anywhere in the manuscript. Rather, the*  
795 *impression is given that such investigations are only made possible by the new type of*  
796 *electrode.*

797 **Our response:** We appreciate the reviewer's generous sharing about the knowledge  
798 of HDsEMG. Yes, we agree the reviewer's point that HDsEMG is already widely  
799 used in different research questions. The objective of showing our results in original  
800 Fig. 5 is also to prove MEAP can complete the task carried before by HDsEMG, just  
801 like we stated in the paragraph: 'Such tools will create remarkable benefits and  
802 provide a new means for clinical diagnosis, medical treatment and sports sciences.'  
803 The reason we said this is our stretchable array indeed can do those investigations  
804 which our new type of electrode can complete better, but much harder by traditional  
805 HDsEMG. We showed them in the new Supplementary Video 3 that traditional  
806 HDsEMG is extremely easy to fall off when it is attached on the muscle-tendon  
807 junction. So using traditional HDsEMG makes less stable recording for sEMG and let  
808 alone the monitoring of tendon displacement under the skin.  
809 As for the reviewer's concern on 'HDsEMG is suitable for localising anatomical  
810 structures such as the neuromuscular junction or tendon insertion', we searched on  
811 Pubmed (<https://pubmed.ncbi.nlm.nih.gov/>) with key words 'EMG', 'array' and  
812 'tendon', there are only 33 results and none of them studied on the location of muscle-  
813 tendon junction (Ref. 40-72), which is also different to two terms the reviewer  
814 proposed. Based on that, we believe this application by MEAP is novel. We also used  
815 it to help our injury prevention analysis which should prove that our stretchable  
816 electrode array has potential for future applications in many areas such as clinical  
817 diagnosis, medical treatment and sports sciences.



818

819 We changed ‘heatmaps’ to ‘muscle activity maps’ in manuscript.

820 See page 19: ‘Muscle activity maps based on RMS values were generated to visualize  
821 the advantage of high-density systems.’

822 ‘... which caused the active zone to move to the right in the muscle activity maps with  
823 an increased activity.’

824 page 21: ‘g, h Muscle activity maps of sEMG recorded ...’

825 Page 34: ‘Muscle contraction task for muscle activity maps’, ‘Muscle activity maps  
826 were generated to help visualize the change in activity during the task’.

827 For fundamental work about fatigue and pain, we added simple introduction in the  
828 manuscript because this is not the focus of this manuscript.

829 See page 2: ‘There are also many works studied on neuromuscular junctions by high  
830 density sEMG, to demonstrate the muscle fatigue and pain<sup>17–21</sup>.’

831 17. Muceli, S. & Farina, D. Simultaneous and proportional estimation of hand  
832 kinematics from EMG during mirrored movements at multiple degrees-of-  
833 freedom. *IEEE Trans. Neural Syst. Rehabil. Eng.* **20**, 371–378 (2012).

834 18. Muceli, S., Falla, D. & Farina, D. Reorganization of muscle synergies during  
835 multidirectional reaching in the horizontal plane with experimental muscle pain.  
836 *J. Neurophysiol.* **111**, 1615–1630 (2014).

837 19. Merletti, R., Rainoldi, A. & Farina, D. Surface electromyography for  
838 noninvasive characterization of muscle. *Exerc. Sport Sci. Rev.* **29**, 20–25 (2001).

839 20. Merletti, R., Farina, D. & Gazzoni, M. The linear electrode array: A useful tool  
840 with many applications. *J. Electromyogr. Kinesiol.* **13**, 37–47 (2003).

841 21. Merletti, R. *et al.* Multichannel surface EMG for the non-invasive assessment of  
842 the anal sphincter muscle. *Digestion* **69**, 112–122 (2004).

843

844 We thank reviewer’s incisive and thoughtful comments again for pointing out the issues  
845 in the manuscript. We feel that our manuscript is more convincible, and the advantages  
846 of MEAP are more unrivaled after we supplemented two experiments according to the  
847 reviewer’s suggestions.

848

849 Reference for the response to the Reviewer #3

850

- 851 1. Harati, A. & Jahanshahi, A. A reliable stretchable dry electrode for monitoring of EEG signals.  
852 *Sensors Actuators A Phys.* **326**, 112727 (2021).
- 853 2. Alban, M. V., Lee, H., Moon, H. & Yoo, S. Micromolding fabrication of biocompatible dry  
854 micro-pyramid array electrodes for wearable biopotential monitoring. *Flex. Print. Electron.* **6**,  
855 045008 (2021).
- 856 3. Jiang, Y. *et al.* Flexible and stretchable dry active electrodes with pdms and silver flakes for bio-  
857 potentials sensing systems. *IEEE Sens. J.* **21**, 12255–12268 (2021).
- 858 4. Yoon, S. *et al.* Highly stretchable metal-polymer hybrid conductors for wearable and self-  
859 cleaning sensors. *NPG Asia Mater.* **13**, 4 (2021).
- 860 5. Yun, I. *et al.* Stable Bioelectric Signal Acquisition Using an Enlarged Surface-Area Flexible Skin  
861 Electrode. *ACS Appl. Electron. Mater.* **3**, 1842–1851 (2021).
- 862 6. Li, Q. *et al.* Highly Thermal-Wet Comfortable and Conformal Silk-Based Electrodes for On-  
863 Skin Sensors with Sweat Tolerance. *ACS Nano* **15**, 9955–9966 (2021).
- 864 7. Tang, W. *et al.* Delamination-Resistant Imperceptible Bioelectrode for Robust  
865 Electrophysiological Signals Monitoring. *ACS Mater. Lett.* **3**, 1385–1393 (2021).
- 866 8. Won, Y. *et al.* Biocompatible, Transparent, and High-Areal-Coverage Kirigami PEDOT:PSS  
867 Electrodes for Electrooculography-Derived Human-Machine Interactions. *ACS Sensors* **6**, 967–  
868 975 (2021).
- 869 9. Blau, R. *et al.* Intrinsically Stretchable Block Copolymer Based on PEDOT:PSS for Improved  
870 Performance in Bioelectronic Applications. *ACS Appl. Mater. Interfaces* **14**, 4823–4835 (2022).
- 871 10. Zhou, X. *et al.* Self-healing, stretchable, and highly adhesive hydrogels for epidermal patch  
872 electrodes. *Acta Biomater.* **139**, 296–306 (2022).
- 873 11. Wang, S. *et al.* Self-adhesive, stretchable, biocompatible, and conductive nonvolatile eutectogels  
874 as wearable conformal strain and pressure sensors and biopotential electrodes for precise health  
875 monitoring. *ACS Appl. Mater. Interfaces* **13**, 20735–20745 (2021).
- 876 12. Zhang, L. *et al.* Fully organic compliant dry electrodes self-adhesive to skin for long-term  
877 motion-robust epidermal biopotential monitoring. *Nat. Commun.* **11**, 4683 (2020).
- 878 13. Cao, J. *et al.* Stretchable and Self-Adhesive PEDOT:PSS Blend with High Sweat Tolerance as  
879 Conformal Biopotential Dry Electrodes. *ACS Appl. Mater. Interfaces* **14**, 39159–39171 (2022).
- 880 14. Roldan-Vasco, S., Restrepo-Agudelo, S., Valencia-Martinez, Y. & Orozco-Duque, A. Automatic  
881 detection of oral and pharyngeal phases in swallowing using classification algorithms and  
882 multichannel EMG. *J. Electromyogr. Kinesiol.* **43**, 193–200 (2018).

- 883 15. Zhuang, M. et al. Highly Robust and Wearable Facial Expression Recognition via Deep-  
884 Learning-Assisted, Soft Epidermal Electronics. *Research* 2021, (2021).
- 885 16. Fortune, B. C., Pretty, C. G., Chatfield, L. T., McKenzie, L. R. & Hayes, M. P. Data captured  
886 using low-cost active electromyography. *Data Br.* 29, 105239 (2020).
- 887 17. Becerra-Fajardo, L. et al. Floating EMG sensors and stimulators wirelessly powered and  
operated  
888 by volume conduction for networked neuroprosthetics. *J. Neuroeng. Rehabil.* 19, 57 (2022).
- 889 18. Ye-Lin, Y. et al. Directed Functional Coordination Analysis of Swallowing Muscles in Healthy  
890 and Dysphagic Subjects by Surface Electromyography. *Sensors* 22, (2022).
- 891 19. Frenzel, D., Greim, C. A., Sommer, C., Bauerle, K. & Roewer, N. Is the bispectral index  
892 appropriate for monitoring the sedation level of mechanically ventilated surgical ICU patients?  
893 *Intensive Care Med.* 28, 178–183 (2002).
- 894 20. Campos, D. P. et al. Short-term fibre intake estimation in goats using surface electromyography  
895 of the masseter muscle. *Biosyst. Eng.* 183, 209–220 (2019).
- 896 21. Phinyomark, A., Phukpattaranont, P. & Limsakul, C. Fractal analysis features for weak and  
897 single-channel upper-limb EMG signals. *Expert Syst. Appl.* 39, 11156–11163 (2012).
- 898 22. Wernbom, M., Järrebring, R., Andreasson, M. A. & Augustsson, J. Acute Effects of Blood Flow  
899 Restriction on Muscle Activity and Endurance During Fatiguing Dynamic Knee Extensions at  
900 Low Load. *J. Strength Cond. Res.* 23, 2389–2395 (2009).
- 901 23. Allen, D. P. A frequency domain Hampel filter for blind rejection of sinusoidal interference  
from  
902 electromyograms. *J. Neurosci. Methods* 177, 303–310 (2009).
- 903 24. Lee, S. et al. Wireless Epidermal Electromyogram Sensing System. *Electronics* 9, 269 (2020).
- 904 25. Shim, J. K., Choi, H. S. & Shin, J. H. Effects of neuromuscular training on knee joint stability  
905 after anterior cruciate ligament reconstruction. *J. Phys. Ther. Sci.* 27, 3613–3617 (2015).
- 906 26. Cantu, E. et al. Printed Multi-EMG Electrodes on the 3D Surface of an Orthosis for  
907 Rehabilitation: A Feasibility Study. *IEEE Sens. J.* 21, 14407–14417 (2021).
- 908 27. Moin, A. et al. A wearable biosensing system with in-sensor adaptive machine learning for hand  
909 gesture recognition. *Nat. Electron.* 4, 54–63 (2021).
- 910 28. Zhu, K., Guo, W., Yang, G., Li, Z. & Wu, H. High-Fidelity Recording of EMG Signals by  
911 Multichannel On-Skin Electrode Arrays from Target Muscles for Effective Human-Machine  
912 Interfaces. *ACS Appl. Electron. Mater.* 3, 1350–1358 (2021).
- 913 29. Lin, Y. et al. High-resolution and large-size stretchable electrodes based on patterned silver  
914 nanowires composites. *Nano Res.* 15, 4590–4598 (2022).

**915** 30. Zhao, H. *et al.* Ultrastretchable and Washable Conductive Microtextiles by Coassembly of Silver

- 916 Nanowires and Elastomeric Microfibers for Epidermal Human-Machine Interfaces. *ACS Mater.*  
917 *Lett.* **3**, 912–920 (2021).
- 918 31. Gandla, S. *et al.* Ultrafast Prototyping of Large-Area Stretchable Electronic Systems by Laser  
919 Ablation Technique for Controllable Robotic Arm Operations. *IEEE Trans. Ind. Electron.* **69**,  
920 4245–4253 (2022).
- 921 32. Mei, Z., Zhao, N., Yang, B. & Liu, J. Flexible Concentric Ring Electrode Array for Low-Noise  
922 and Non-Invasive Detection. in *Proceedings of the IEEE International Conference on Micro*  
923 *Electro Mechanical Systems (MEMS)* vols 2021-January 266–269 (Institute of Electrical and  
924 Electronics Engineers Inc., 2021).
- 925 33. Chandra, S. *et al.* Performance Evaluation of a Wearable Tattoo Electrode Suitable for High-  
926 Resolution Surface Electromyogram Recording. *IEEE Trans. Biomed. Eng.* **68**, 1389–1398  
927 (2021).
- 928 34. Alizadeh-Meghbrazi, M. *et al.* A Mass-Produced Washable Smart Garment with Embedded  
929 Textile EMG Electrodes for Control of Myoelectric Prostheses: A Pilot Study. *Sensors* **22**, 666  
930 (2022).
- 931 35. Driscoll, N. *et al.* MXene-infused bioelectronic interfaces for multiscale electrophysiology and  
932 stimulation. *Sci. Transl. Med.* **13**, eabf8629 (2021).
- 933 36. Murphy, B. B. *et al.* A Gel-Free Ti<sub>3</sub>C<sub>2</sub>Tx-Based Electrode Array for High-Density, High-  
934 Resolution Surface Electromyography. *Adv. Mater. Technol.* **5**, 2000325 (2020).
- 935 37. Velasco-Bosom, S. *et al.* Conducting Polymer-Ionic Liquid Electrode Arrays for High-Density  
936 Surface Electromyography. *Adv. Healthc. Mater.* **10**, 2100374 (2021).
- 937 38. Ting, J. E. *et al.* Sensing and decoding the neural drive to paralyzed muscles during attempted  
938 movements of a person with tetraplegia using a sleeve array. *J. Neurophysiol.* **127**, 2104–2118  
939 (2021).
- 940 39. Kleine, B. U., Schumann, N. P., Stegeman, D. F. & Scholle, H. C. Surface EMG mapping of the  
941 human trapezius muscle: The topography of monopolar and bipolar surface EMG amplitude and  
942 spectrum parameters at varied forces and in fatigue. *Clin. Neurophysiol.* **111**, 686–693 (2000).
- 943 40. Carraro, U. Thirty years of translational research in Mobility Medicine: Collection of abstracts  
944 of the 2020 Padua Muscle Days. *Eur. J. Transl. Myol.* **30**, 8826 (2020).
- 945 41. Huang, C., Chen, X., Cao, S. & Zhang, X. Muscle-tendon units localization and activation level  
946 analysis based on high-density surface EMG array and NMF algorithm. *J. Neural Eng.* **13**, 66001  
947 (2016).
- 948 42. Chen, X., Wang, S., Huang, C., Cao, S. & Zhang, X. ICA-based muscle-tendon units localization

- 949 and activation analysis during dynamic motion tasks. *Med. Biol. Eng. Comput.* 56, 341–353  
950 (2018).
- 951 43. Zhang, X. et al. EMG-Torque Relation in Chronic Stroke: A Novel EMG Complexity  
952 Representation With a Linear Electrode Array. *IEEE J. Biomed. Heal. informatics* 21, 1562–  
953 1572 (2017).
- 954 44. Thompson, C. K., Johnson, M. D., Negro, F., Farina, D. & Heckman, C. J. Motor Unit  
Discharge  
955 Patterns in Response to Focal Tendon Vibration of the Lower Limb in Cats and Humans. *Front.*  
956 *Integr. Neurosci.* 16, 836757 (2022).
- 957 45. McAvoy, M. et al. Flexible Multielectrode Array for Skeletal Muscle Conditioning,  
958 Acetylcholine Receptor Stabilization and Epimysial Recording After Critical Peripheral Nerve  
959 Injury. *Theranostics* 9, 7099–7107 (2019).
- 960 46. Li, W. & Sakamoto, K. The influence of location of electrode on muscle fiber conduction  
961 velocity and EMG power spectrum during voluntary isometric contraction measured with surface  
962 array electrodes. *Appl. Human Sci.* 15, 25–32 (1996).
- 963 47. Merletti, R., Farina, D. & Gazzoni, M. The linear electrode array: a useful tool with many  
964 applications. *J. Electromyogr. Kinesiol. Off. J. Int. Soc. Electrophysiol. Kinesiol.* 13, 37–47  
965 (2003).
- 966 48. English, A. W., Wolf, S. L. & Segal, R. L. Compartmentalization of muscles and their motor  
967 nuclei: the partitioning hypothesis. *Phys. Ther.* 73, 857–867 (1993).
- 968 49. Wakeling, J. M. The recruitment of different compartments within a muscle depends on the  
969 mechanics of the movement. *Biol. Lett.* 5, 30–34 (2009).
- 970 50. Tokunaga, T. [Muscle fiber conduction velocity and frequency parameters of surface EMG  
971 during fatigue of the human masseter muscle. 2. Frequency parameters]. *Nihon Hotetsu Shika*  
972 *Gakkai Zasshi* 33, 804–817 (1989).
- 973 51. Farina, D. & Merletti, R. A novel approach for estimating muscle fiber conduction velocity by  
974 spatial and temporal filtering of surface EMG signals. *IEEE Trans. Biomed. Eng.* 50, 1340–1351  
975 (2003).

- 976 52. Thompson, C. K. et al. Robust and accurate decoding of motoneuron behaviour and prediction  
977 of the resulting force output. *J. Physiol.* 596, 2643–2659 (2018).
- 978 53. Botter, A., Vieira, T. M., Geri, T. & Roatta, S. The peripheral origin of tap-induced muscle  
979 contraction revealed by multi-electrode surface electromyography in human vastus medialis. *Sci.*  
980 *Rep.* 10, 2256 (2020).
- 981 54. Merletti, R., Roy, S. H., Kupa, E., Roatta, S. & Granata, A. Modeling of surface myoelectric  
982 signals--Part II: Model-based signal interpretation. *IEEE Trans. Biomed. Eng.* 46, 821–829  
983 (1999).
- 984 55. Ye, X., Beck, T. W. & Wages, N. P. Prolonged passive static stretching-induced innervation  
zone  
985 shift in biceps brachii. *Appl. Physiol. Nutr. Metab. = Physiol. Appl. Nutr. Metab.* 40, 482–488  
986 (2015).
- 987 56. De la Fuente, C. et al. Distal overactivation of gastrocnemius medialis in persistent  
plantarflexion  
988 weakness following Achilles tendon repair. *J. Biomech.* 148, 111459 (2023).
- 989 57. Minetto, M. A., Botter, A., Ravenni, R., Merletti, R. & De Grandis, D. Reliability of a novel  
990 neurostimulation method to study involuntary muscle phenomena. *Muscle Nerve* 37, 90–100  
991 (2008).
- 992 58. Bujalski, P., Martins, J. & Stirling, L. A Monte Carlo analysis of muscle force estimation  
993 sensitivity to muscle-tendon properties using a Hill-based muscle model. *J. Biomech.* 79, 67–77  
994 (2018).
- 995 59. Barandun, M., von Tscherner, V., Meuli-Simmen, C., Bowen, V. & Valderrabano, V.  
Frequency  
996 and conduction velocity analysis of the abductor pollicis brevis muscle during early fatigue. *J.*  
997 *Electromyogr. Kinesiol. Off. J. Int. Soc. Electrophysiol. Kinesiol.* 19, 65–74 (2009).
- 998 60. Mito, K. & Sakamoto, K. On the evaluation of muscle fiber conduction velocity considering  
999 waveform properties of an electromyogram in *M. biceps brachii* during voluntary isometric  
1000 contraction. *Electromyogr. Clin. Neurophysiol.* 42, 137–149 (2002).
- 1001 61. Mananas, M. A., Rojas, M., Mandrile, F. & Chaler, J. Evaluation of muscle activity and fatigue





- 1003 Eng. Med. Biol. Soc. IEEE Eng. Med. Biol. Soc. Annu. Conf. 2005, 5824–5827 (2005).
- 1004 62. Sakamoto, K. & Li, W. Effect of muscle length on distribution of muscle fiber conduction  
1005 velocity for M. biceps brachii. *Appl. Human Sci.* 16, 1–7 (1997).
- 1006 63. Farina, D., Arendt-Nielsen, L., Merletti, R. & Graven-Nielsen, T. Assessment of single motor  
1007 unit conduction velocity during sustained contractions of the tibialis anterior muscle with  
1008 advanced spike triggered averaging. *J. Neurosci. Methods* 115, 1–12 (2002).
- 1009 64. Rodriguez-Falces, J., Botter, A., Vieira, T. & Place, N. The M waves of the biceps brachii have  
1010 a stationary (shoulder-like) component in the first phase: implications and recommendations for  
1011 M-wave analysis. *Physiol. Meas.* 42, 15007 (2021).
- 1012 65. Rojas, M., Mañanas, M. A., Muller, B. & Chaler, J. Activation of forearm muscles for wrist  
1013 extension in patients affected by lateral epicondylitis. *Annu. Int. Conf. IEEE Eng. Med. Biol.*  
1014 *Soc. IEEE Eng. Med. Biol. Soc. Annu. Int. Conf. 2007*, 4858–4861 (2007).
- 1015 66. Mito, K. & Sakamoto, K. Distribution of muscle fiber conduction velocity of m. masseter  
during  
1016 voluntary isometric contraction. *Electromyogr. Clin. Neurophysiol.* 40, 275–285 (2000).
- 1017 67. Cho, S.-G. et al. Hand motion recognition based on forearm deformation measured with a  
1018 distance sensor array. *Annu. Int. Conf. IEEE Eng. Med. Biol. Soc. IEEE Eng. Med. Biol. Soc.*  
1019 *Annu. Int. Conf. 2016*, 4955–4958 (2016).
- 1020 68. Masuda, T. & Sadoyama, T. The propagation of single motor unit action potentials detected by  
1021 a surface electrode array. *Electroencephalogr. Clin. Neurophysiol.* 63, 590–598 (1986).
- 1022 69. Nishihara, K., Futami, T., Hosoda, K. & Gomi, T. Validation of estimated muscle fiber  
1023 conduction velocity with the normalized peak-averaging technique. *J. Electromyogr. Kinesiol.*  
1024 *Off. J. Int. Soc. Electrophysiol. Kinesiol.* 15, 93–101 (2005).
- 1025 70. Li, W. & Sakamoto, K. Distribution of muscle fiber conduction velocity of M. biceps brachii  
1026 during voluntary isometric contraction with use of surface array electrodes. *Appl. Human Sci.*  
1027 15, 41–53 (1996).
- 1028 71. Sakamoto, K. & Mito, K. Muscle fiber conduction velocity during isometric contraction and the  
1029 recovery period. *Electromyogr. Clin. Neurophysiol.* 40, 151–161 (2000).

- 1030 72. Hník, P., Vejsada, R. & Macková, E. V. EMG activity in 'compensatory' muscle hypertrophy.  
1031 *Physiol. Bohemoslov.* 35, 285–288 (1986).

## REVIEWER COMMENTS

### Reviewer #1 (Remarks to the Author):

The authors have made well addressed my concerns in the revised manuscript. The quality of the revised version of this study is worthy of publishing in Nature Communcations.

### Reviewer #2 (Remarks to the Author):

Here are some other comments which should be further addressed before its consideration for publication:

1. Could be the MEAP be used repetitively? (I mean the 4\*6 array, not the PPT electrode)
2. How about the permeability of the MEAP since the authors claimed its long-term usage?
3. For the reader's better understanding, more details are expected on the MEAP connected to the data acquisition module via flexible printable circuit board connectors.
4. The authors compared the attachment performance between the commercial array and MEAP. In fact, the spatial density and distribution of the electrode sites is also important to its application. The commercial array has 64 channels with 8\*8 array while the MEAP is 24 with 4\*6 array, which leads to mismatch location of the electrode sites during comparison. It would be better to make a comparison directly with the same configuration.
5. In addition to the innovative aspects of the PPT electrode and the MEAP, please also specify the corresponding limitations at Conclusion Section.

### Reviewer #3 (Remarks to the Author):

The authors have tried to address some of my concerns. However, they only succeeded to a very limited extent. The manuscript credibly demonstrates that the mechanical properties of the new electrode array are superior to other electrode arrays. The same applies to the purely electrical properties. However, the manuscript still has major shortcomings when the suitability of the new electrode array is examined with regard to the detection of sEMG signals and compared with state-of-the-art methods. As an example, I refer again to Fig. 4e, which still compares the sEMG signals derived with the new electrodes with signals from sEMG derivations that do not comply with the international recommendations for the derivation of sEMG signals. The international recommendations for the

detection of sEMG signals are defined and described in the SENIAM and CEDE projects. The project results are published as well as described on the internet. E.g. it seems, that the electrode distance is larger than 1/4 of the muscle fibre length of the FCU and that the sensor is placed halfway the (most) distal motor endplate zone and the distal tendon (SENIAM Recommendations). In addition, any information about the sensor used, such as size of the active area, interelectrode distance and exact position of the electrodes as well as the treatment of the skin, is missing. This information is essential to evaluate the quality of the derived sEMG signals and is standard in any sEMG publication, even when comparing two methods. Additionally, open cable clips were used to fix the cables to the electrodes. This worsens the SNR considerably. Shielded connectors are more common.

The manuscript is still full of claims - often in the superlative - about signal quality and possible applications of the described electrode, which are not statistically proven. I would like to draw special attention to the statistics here once again! I do not see any statistical calculation in the entire manuscript that shows that the claims made with respect to application are statistically significant, or that at least a tendency can be read. Instead, individual examples are shown, which is good, but does not justify the strong formulations and the emphasis on the new electrode over existing methods. That the major problem with the paper is the lack of statistics. As it stands, there is no evidence for the results in the different applications, and for me that is a no-go for a publication.

Furthermore, some of the claims about the state of the art of existing sEMG electrode/lead methods are simply wrong. Let me cite the abstract: "However, current sEMG electrodes do not offer adequate high-quality data for their widespread use in clinics and everyday life, since these are neither stretchable nor arrayed". This sentence is simply wrong! Electrode arrays have been available for many years and some of them are stretchable. Whether stretchability improves the clinical significance of the sEMG is unknown, while the clinical benefit of the array is proven. The manuscript is full of such examples and should be formulated in a less absolute way to reflect reality.

1           **Response to reviewers for the manuscript (NCOMMS-22-46103B-Z)**

2

13    *Reviewer #1 (Remarks to the Author):*

14

15    *The authors have made well addressed my concerns in the revised manuscript. The*  
16    *quality of the revised version of this study is worthy of publishing in Nature*  
17    *Communications.*

18

19    **Our response:** We appreciate the reviewer taking the time to carefully read our  
revised

20    manuscript and provide such excellent feedback.

21

22    *Reviewer #2 (Remarks to the Author):*

23

24    *Here are some other comments which should be further addressed before its*  
25    *consideration for publication:*

26

27    **Our response:** We really value the reviewer's time spent reading our revised  
manuscript

28    thoroughly and providing other comments to further improve the manuscript.

29

30    1. *Could be the MEAP be used repetitively? (I mean the 4\*6 array, not the PPT*

31 *electrode)*

32

33 **Our response:** We appreciate the reviewer seeking further clarification. In the previous  
34 response letter, we proved TPP electrodes can be used repetitively by different tests. We  
35 have also referenced our earlier publication<sup>1</sup>, which demonstrates the reattachment of  
36 the substrate part on the skin repetitively. By combining these findings, we aimed to  
37 convey that the MEAP is suitable for repetitive use.

38

39 To provide a more convincing answer to the reviewer's question, we have designed a  
40 new experiment specifically to demonstrate the repetitive use of the MEAP on the skin.  
41 However, it should be noted that the signal qualities obtained from this experiment were  
42 slightly lower compared to previous tests conducted using TPP electrodes. This is  
43 primarily due to the much smaller contact area of the channels in the MEAP.  
44 Nevertheless, the signal qualities obtained were still sufficiently high (approximately  
45 20 dB) for use after repetitive attachment.

46

47 While we acknowledge the value of the experiment suggested by the reviewer, we have  
48 decided that incorporating these results into the main body of the text would disrupt the  
49 current outline, as the manuscript primarily focuses on electrodes and the MEAP  
50 separately. Therefore, we have chosen to include these additional findings in the  
51 Supplementary Information section.

52

53 Our changes on Page 11: **As for the MEAP, we checked the reattachment performance**  
54 **of the patch (Supplementary Fig. 14). The results showed all channels of MEAP have**  
55 **stable performances. This indicates that MEAP can be used repetitively.**

56

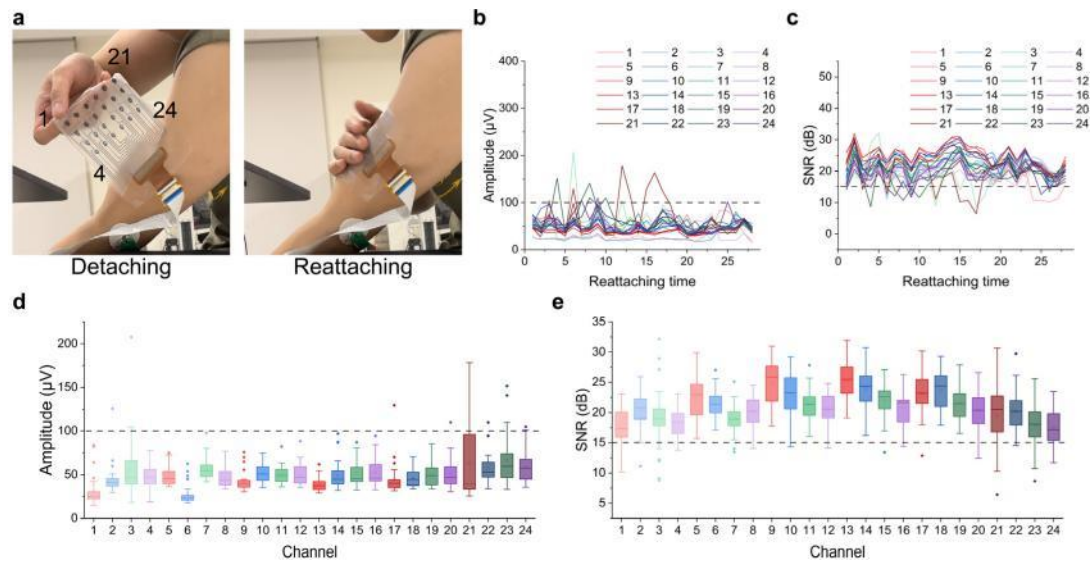

57

58 **Supplementary Fig. 14 The reattachment test of 24-channel MEAP on the skin.**

59 **a** Images showing the process of detachment and reattachment of MEAP on biceps  
60 brachii.

61 **b, c** The baseline noise of each channel and the SNR of each channel plotted for each  
62 reattachment. The baseline noise consistently maintained an amplitude of  
63 approximately 50  $\mu\text{V}$  across all channels, even after 28 reattachments. Similarly, the  
64 SNR remained stable at 20 dB across all channels after 28 reattachments.

65 **d, e** Whisker plots of statistical verification of **b** and **c** for the 28 reattachments.  
66 Statistical analysis was conducted to assess the baseline noise and SNR of each channel  
67 throughout the reattachment test. 28 reattachments, per channel, were included in the  
68 analysis. The box plots depict the mean (center square), median (center line), 25th to

69 75th percentiles (box), and the lower and upper whiskers representing the smallest and  
70 largest values that are  $\leq 1.5$  times the interquartile range, respectively. Outliers are also  
71 shown.

72

73 *2. How about the permeability of the MEAP since the authors claimed its long-term*  
74 *usage?*

75

76 **Our response:** We appreciate the reviewer for highlighting the concern regarding  
77 permeability. The insensible sweat rate of individuals typically ranges from 12 to 42



78  $\text{g}\cdot\text{m}^{-2}\cdot\text{h}^{-1}$  (Ref. 2), indicating that materials with similar permeability can meet the  
79 requirements for daily use or long-term wearing. The substrate material used for the  
80 MEAP is PDMS, which inherently possesses permeability. Our results demonstrate  
that  
81 the MEAP has a permeability of approximately  $20 \text{ g}\cdot\text{m}^{-2}\cdot\text{h}^{-1}$ , which is suitable for the  
82 normal evaporation of sweat.

83

84 Moreover, if necessary, punctures can be made on the substrate to further enhance the  
85 permeability of the MEAP. This adjustment can be customized based on individual  
86 experiments and subject requirements. However, it is important to note that in  
87 comparison to PDMS, polyimide exhibited significantly lower permeability, implying  
88 limitations for long-term use.

89

90 As per the structure of our manuscript, similar to the first additional test, we have  
91 included these results in the Supplementary Information section. This decision allows  
92 us to maintain the coherence and flow of the main body text.

93

94 Our modifications on Page 11: **We also examined the permeability performance of**  
95 **MEAP for daily long-term use (Supplementary Fig. 15). The results demonstrate that**  
96 **the permeability of the MEAP is well-suited for extended periods of usage, as it does**  
97 **not hinder the normal evaporation of sweat from the skin. Furthermore, we discovered**  
98 **that the permeability of the MEAP can be adjusted by modifying the physical structure**  
99 **of the substrate. This ability to tune the permeability enables us to create a comfortable**  
100 **wearing experience for daily use, as the permeability can be increased to a level that**  
101 **promotes adequate airflow.**

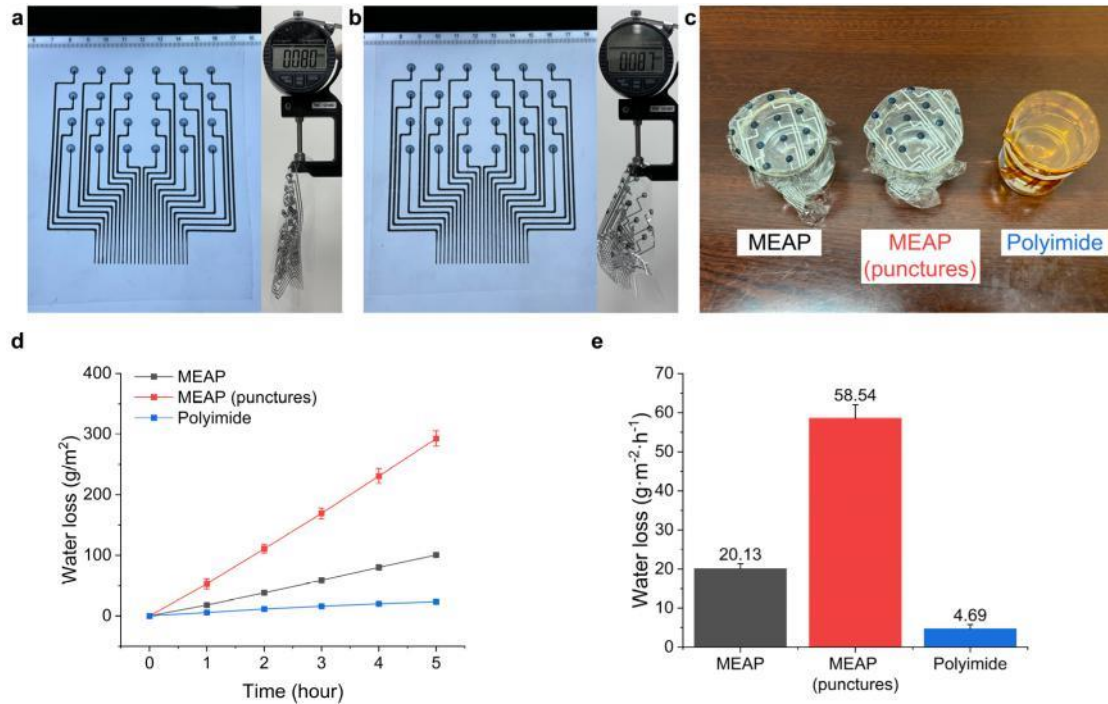

102

103 **Supplementary Fig. 15 The permeability comparison test between MEAP, MEAP**  
 104 **(punctures) and polyimide.**

105 **a, b** Images showing the MEAP and MEAP (punctures) with thicknesses of 80 and 87  
 106  $\mu\text{m}$ , respectively. The MEAP (punctures) features 24 punctures (1 mm in diameter),  
 107 corresponding to the number of TPP electrodes on the patch.

108 **c** The experimental setup for the permeability test. Three beakers, each filled with 100

109 ml of deionized water, were covered by MEAP, MEAP (punctures), and polyimide,  
110 respectively. Each beaker was secured with a rubber band to ensure that water only  
111 passed through the cover. The three beakers were placed in a programmable  
112 temperature and humidity tester (QHP-360BE, LICHEN, China) set to a temperature  
113 of 33 °C and a humidity of 30%, simulating the conditions on human skin.

114 **d** The water loss rates in the three beakers. The MEAP (punctures) exhibited higher  
115 water loss compared to the MEAP, indicating that the permeability can be adjusted by  
116 modifying the physical structure of the substrate. Measurements were recorded for each  
117 beaker every hour, with  $n = 3$  samples for each recording.

118 **e** The water loss rate of each cover. Considering that the insensible sweat rate of  
119 individuals ranges from 12 to 42  $\text{g}\cdot\text{m}^{-2}\cdot\text{h}^{-1}$ , the permeability of the MEAP is sufficient  
120 to provide a comfortable wearing experience for daily use.

121

122 *3. For the reader's better understanding, more details are expected on the MEAP*  
123 *connected to the data acquisition module via flexible printable circuit board connectors.*

124

125 **Our response:** We appreciate the reviewer's request for more details regarding the  
126 connection. In our study, we employed hot-pressing to combine the Flexible Printed  
127 Circuit (FPC) with the MEAP. By using a customized back-end connector, each channel  
128 of the MEAP could be independently connected to the G.tec recording system. For  
129 better understanding, we have included a photograph in the Supplementary Information,  
130 illustrating the entire setup.

131

132

133 **Supplementary Fig. 20 The whole setup for connection between MEAP and EMG**  
134 **recording system.**

135

136 See page 16:

137 The MEAP was connected to the sEMG recording system via flexible printed circuit  
138 (Supplementary Fig. 20).

139

140 We also added more information in the MATERIALS AND METHODS. See page 32:

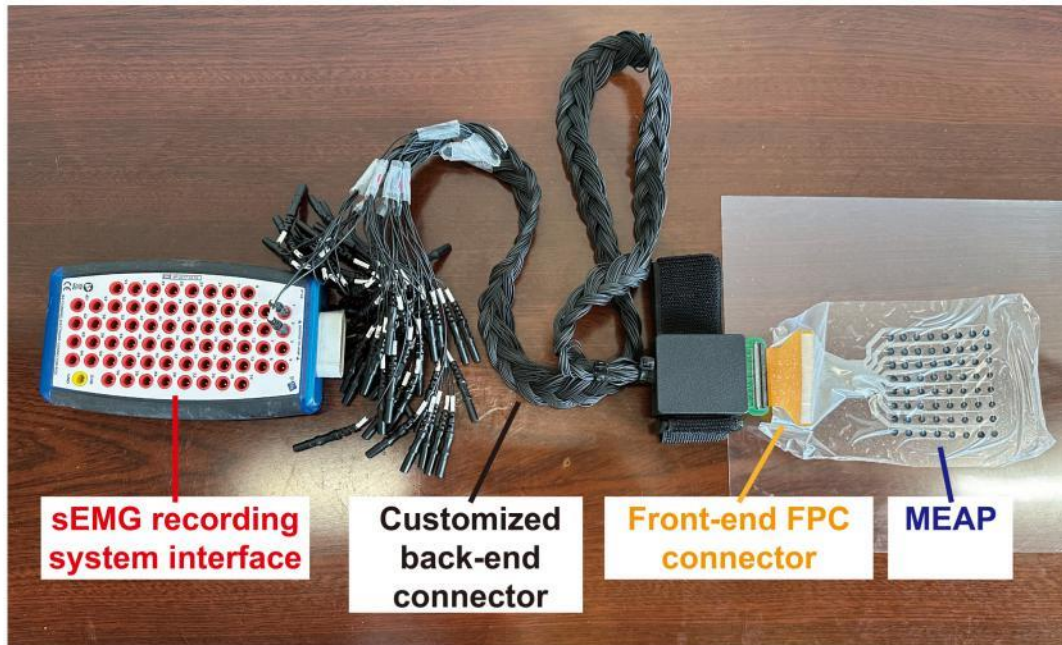

141 Note that electrode sites and connection pads were protected by silicone films during  
142 the encapsulation to allow the electrodes and connection pads to be exposed.

143

144 The front-end connectors were made by polyimide flexible printed circuit (FPC). Front-  
145 end connectors were designed and fabricated (EasyEDA, China) for connecting specific  
146 MEAPs. The FPC and MEAP were hot-pressed together with force of 50 N and  
147 temperature of 140 °C for 30 s by a hot-pressing machine (G311, Freamc, China). With  
148 a customized back-end connector, every channel of MEAP can be independently  
149 connected to EMG recording system.

150

151 *4. The authors compared the attachment performance between the commercial array  
152 and MEAP. In fact, the spatial density and distribution of the electrode sites is also  
153 important to its application. The commercial array has 64 channels with 8\*8 array  
154 while the MEAP is 24 with 4\*6 array, which leads to mismatch location of the electrode  
155 sites during comparison. It would be better to make a comparison directly with the same  
156 configuration.*

157

158 **Our response:** We appreciate the reviewer's insightful comment, and we highly value  
159 the advice provided. We agree with the reviewer's suggestion regarding the  
160 configuration of the electrode array and its potential impact on the recording results. To  
161 ensure a fairer comparison, we repeated experiment using the updated 64-channel  
162 MEAP. This updated MEAP has the exact same configuration as the commercial  
163 electrode array, including the surface area of the substrate (Supplementary Fig. 19). We  
164 applied the same analysis method to process the data obtained from the experiment, and  
165 the results consistently demonstrated that the 64-channel MEAP exhibited superior and  
166 more stable performance in terms of baseline noise and SNR when compared to the  
167 commercial electrode array, both on muscle and muscle-tendon junction recordings.  
168 Although the smaller contact area of the electrode on the 64-channel MEAP led to a  
169 slightly lower SNR compared to the previous 24-channel MEAP, the differences in  
170 performance between the MEAP and the commercial electrode array remained

171 statistically significant. Given these findings, most of our previous conclusions remain  
 172 valid, and we have made minimal changes to the text. The main changes have been  
 173 implemented in Figure 5 and two Supplementary Videos.

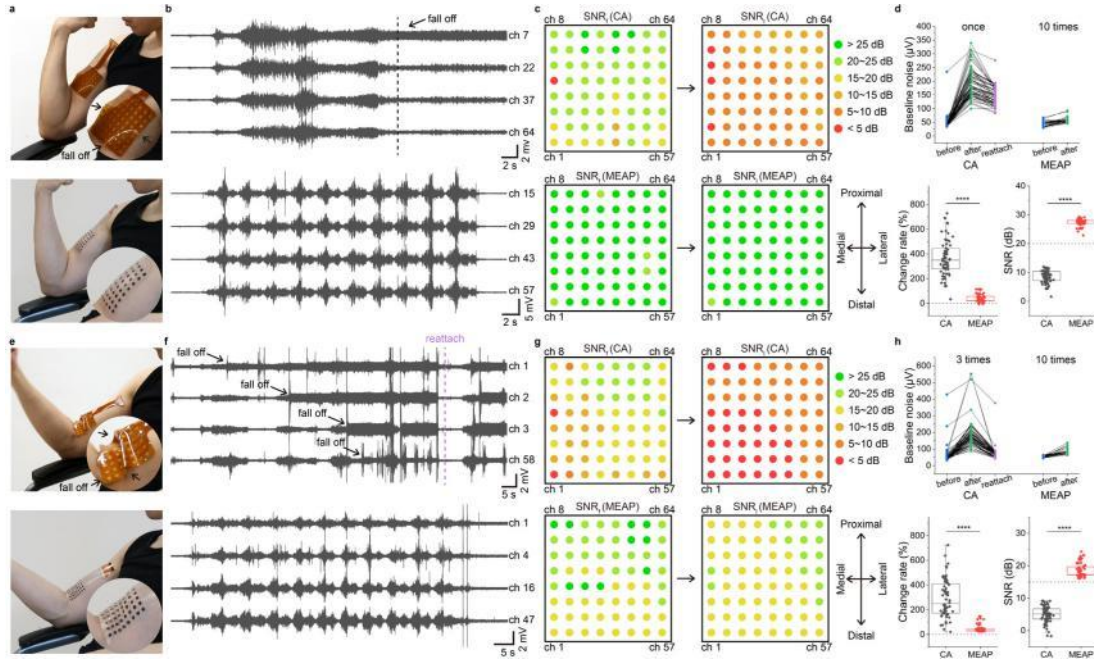

174

175

176 **Fig. 5 The comparison of attachment performances between commercial array**  
 177 **and MEAP.**

178 **a, e** Photographs of CA and MEAP attachment, illustrating the difference when

179 recording from muscle and muscle-tendon junction of biceps brachii.  
180 **b, f** sEMG signals recorded using CA and MEAP on muscle and muscle-tendon junction  
181 of biceps brachii. Four typical channels were picked for each recording.  
182 **c, g** Spatial SNR performance map for each channel of CA and MEAP for the first and  
183 last muscle contraction. SNR<sub>f</sub>: SNR of the first contraction; SNR<sub>l</sub>: SNR of the last  
184 contraction.  
185 **d, h** Statistical analysis of performances between CA and MEAP, including baseline  
186 noise level of CA before and after one or three muscle contractions, as well as after  
187 reattachment; baseline noise level of MEAP before and after ten muscle contractions;  
188 baseline noise change rates before and after muscle contractions; SNR performance of  
189 the last muscle contraction recorded by each of the CA and MEAP channels.  
190 Significance was determined by one sample t test (\*P< 0.05; \*\*P< 0.01; \*\*\*P< 0.001;



191 \*\*\*\*P < 0.0001).

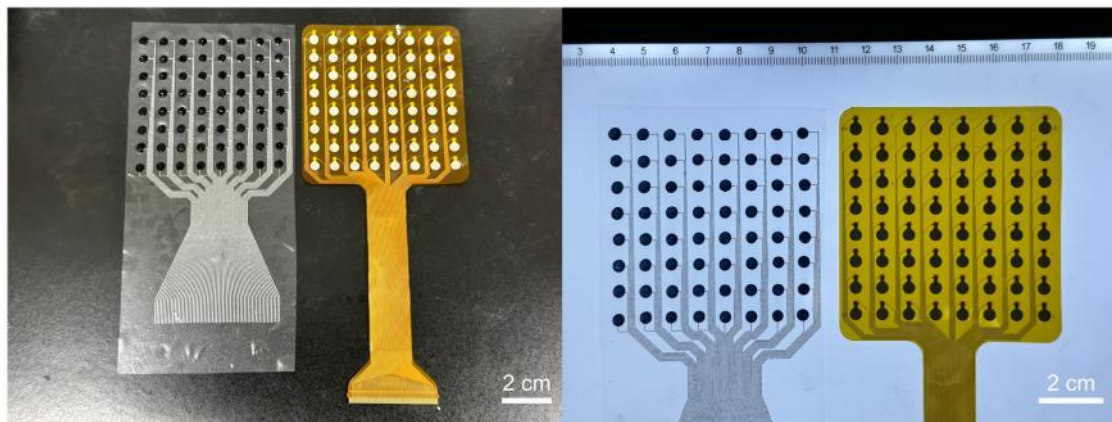

192

193

194 **Supplementary Fig. 19 The configuration comparison between MEAP and CA.**

195 Both arrays have electrode diameter of 4 mm and IED of 8 mm.

196

197 See page 16: ...with human skin (Young's modulus of 10 kPa). To fairly compare the  
198 contact performance on the skin, we fabricated a 64-channel MEAP with the same  
199 configuration as the CA (Supplementary Fig. 19). We recorded a movie to ... resulting  
200 in a significantly lower SNR. While the MEAP exhibited a much more stable noise  
201 level even after ten contractions, maintaining a high SNR. We also recorded sEMG  
202 signals... the first contraction to the last one (Fig. 5g). MEAP on the other hand,  
203 produced stable recordings with all channels having SNR greater than 15 dB. Statistical  
204 analysis of sEMG...

205

206 *5. In addition to the innovative aspects of the PPT electrode and the MEAP, please also*  
207 *specify the corresponding limitations at Conclusion Section.*

208

209 **Our response:** We appreciate the reviewer's suggestion for a more comprehensive  
210 discussion of our work. We acknowledge that there are certain limitations to the current  
211 MEAP design, and we are actively working towards addressing them to expand the  
212 potential applications of MEAP. One specific area of focus is the accurate recording  
213 and recognition of single motor unit signals from surface electromyography (sEMG)

214 signals. If MEAP can achieve this capability, it has the potential to be utilized in clinical  
215 diagnosis, replacing the use of needle electrodes. This would offer patients a much more  
216 comfortable experience while maintaining the accuracy and reliability of the diagnostic  
217 process. Such a development could revolutionize EMG clinical diagnosis by replacing  
218 invasive tools with non-invasive alternatives. Furthermore, we recognize that the cable  
219 connection is currently a limiting factor in the daily application of MEAP. We are  
220 actively addressing this issue to improve the overall user experience and make MEAP  
221 more suitable for everyday use. We have incorporated these discussions into the  
222 conclusion section of our manuscript to provide a more comprehensive overview of the  
223 potential implications and future directions of our work.

224

225 See page 30: e.g., prosthetics or virtual reality. **We also aim to replace invasive needle**  
226 **electrodes in clinical applications with MEAP to provide patients with improved**  
227 **comfort. However, current MEAPs have difficulty recognizing single motor unit signals**  
228 **from sEMG recording because the lack of intelligent back-end algorithms causes low**  
229 **single motor unit selection efficiency and accuracy. In this case, MEAP can only**  
230 **provide limited help to clinical diagnosis. Another drawback of current MEAPs is they**  
231 **are using cable connection, which limits the application scenarios and simplicity. To**  
232 **address these issues, we are endeavoring to combine MEAP with intelligent algorithms**  
233 **and wireless modules to make whole devices more useful in clinic scenario and more**  
234 **portable in daily life. We believe in the future, MEAP has enormous potential to be**  
235 **commercialized because of its low cost and simple fabrication, thus providing a new**  
236 **platform for disease diagnosis, daily rehabilitation management and scientific exercise.**

237

238 *Reviewer #3 (Remarks to the Author):*

239

240 *The authors have tried to address some of my concerns. However, they only succeeded*  
241 *to a very limited extent. The manuscript credibly demonstrates that the mechanical*  
242 *properties of the new electrode array are superior to other electrode arrays. The same*  
243 *applies to the purely electrical properties.*

244

245 **Our response:** We sincerely appreciate the reviewer's acknowledgement of our effort  
246 and the recognition of the superior mechanical and electrical properties of our electrode  
247 array. We are grateful for the time and attention the reviewer dedicated to carefully  
248 reviewing our manuscript once again.

249

250 *However, the manuscript still has major shortcomings when the suitability of the new*  
251 *electrode array is examined with regard to the detection of sEMG signals and compared*  
252 *with state-of-the-art methods. As an example, I refer again to Fig. 4e, which still*  
253 *compares the sEMG signals derived with the new electrodes with signals from sEMG*  
254 *derivations that do not comply with the international recommendations for the*  
255 *derivation of sEMG signals. The international recommendations for the detection of*  
256 *sEMG signals are defined and described in the SENIAM and CEDE projects. The*  
257 *project results are published as well as described on the internet. E.g. it seems, that the*  
258 *electrode distance is larger than 1/4 of the muscle fibre length of the FCU and that the*  
259 *sensor is placed halfway the (most) distal motor endplate zone and the distal tendon*  
260 *(SENIAM Recommendations).*

261

262 **Our response:** We thank the reviewer for the criticism about the sEMG derivation in  
263 our manuscript. We appreciate your feedback as it helps us improve the article. Upon  
264 thorough examination of our sEMG derivation method and the articles the reviewer  
265 suggested, we found that the majority of our protocols align with international  
266 recommendations. Allow us to address each point in detail:

267

268 We have carefully compared two standards proposed by the reviewer with our  
269 electrodes based on the SENIAM guidelines. We apologize for the omission of the  
270 Inter-electrode distance (IED) information in the 'sEMG signal recording' section,  
271 where the IED between two Red Dot 2223 or TPP electrodes is consistently set at 20  
272 mm. This oversight may have led the reviewer to perceive that '*the electrode distance*  
273 *is larger than 1/4 of the muscle fiber length of the FCU*'. However, after reviewing

274 several articles investigating the muscle length of the Flexor Carpi Ulnaris (FCU), we  
275 found that our IED of 20 mm is actually less than 1/4 of the typical muscle fiber length<sup>3,4</sup>.  
276 For instance, Table 1 in Ref 3 demonstrates that the FCU muscle length is '**236.5 ± 5.4**  
277 **mm**'.<sup>3</sup> Additionally, Ref 4 provides the details that '*The flexor carpi ulnaris muscle*  
278 *presents a total length of 26.5 cm, with a muscular belly of 24.5 cm of length by 3.5*  
279 *cm of width and 0.5 cm of thickness;*'<sup>4</sup> These findings confirm that the usual length of  
280 the FCU exceeds 200 mm, indicating that our IED of 20 mm falls within the acceptable  
281 range of being less than 1/4 of the muscle fiber length of the FCU.

282

283 Regarding electrode placements, SENIAM recommends the sensor be placed halfway  
284 between the (most) distal motor endplate zone and the distal tendon. However, the  
285 endplate zone is hard to identify for each muscle, so researchers usually attach the  
286 electrodes on the muscle belly or the bulkiest part of the muscle<sup>5</sup>, which is also reported  
287 by SENIAM. We opted to follow this guidance because we did have difficulty in  
288 locating the endplate zone precisely. We supplement this information in our method  
289 section.

290 See page 34: '**For fatigue comparison tests, electrodes were attached on the most**  
291 **prominent bulge of the muscle belly of FCU, and different types of electrodes were**  
292 **attached on the exactly same position.'**

293

294 To provide further clarification that we followed the SENIAM recommendations for all  
295 our sEMG derivations, we present the evidence below:

296

297 Electrode Shape and Size: As we compared our electrodes with the commercial Red  
298 Dot 2223 electrodes, the shape and size parameters were predetermined. However, we  
299 have previously discussed the reliability of these electrodes in our response letter,  
300 ensuring that this aspect aligns with the standard.

301

302 Inter-Electrode Distance (IED): '*SENIAM recommends to apply the bipolar sEMG*  
303 *electrodes around the recommended sensor location with an inter electrode distance*

304 *of 20 mm.* We have followed the recommendation and adjusted the IED to 20 mm  
305 accordingly.

306

307 Orientation of Electrodes: *‘SENIAM recommends that the bipolar SEMG electrodes*  
308 *should be placed around the recommended sensor location with the orientation*  
309 *parallel to the muscle fibres.* We have carefully followed the recommendation and  
310 aligned the orientation of our electrodes parallel to the FCU fiber.

311

312 Fixation on the Skin: *‘SENIAM recommends to use elastic band or (double sided)*  
313 *tape / rings for the fixation of the electrodes(construction) and cables to the skin in*  
314 *such a way that the electrodes are properly fixed to the skin, movement is not*  
315 *hindered and cables are not pulling the electrodes(construction).* Our Ag/AgCl and  
316 TPP electrodes were properly fixed to the skin because they are both sticky.

317

318 Location of the Reference Electrode: *‘Depending on the application SENIAM*  
319 *recommends to use the wrist, the proc. spin. of C7 or the ankle as the standard*  
320 *location of the reference electrode.* In our study, we opted to attach the reference  
321 electrode to the elbow to maintain a stable reference potential.

322

323 With regard to CEDE, we inspected all related published matrices<sup>6-10</sup> but could not find  
324 any details about sEMG derivations. Instead, we used the article<sup>11</sup> by Hermens et al  
325 ([https://doi.org/10.1016/S1050-6411\(00\)00027-4](https://doi.org/10.1016/S1050-6411(00)00027-4), with >6000 citations on Google scholar)  
326 which is cited by the CEDE matrices and provides details about sEMG derivations, to  
327 compare with our own sEMG recording protocols. Allow us to compare each point in  
328 detail:

329

330 Electrode material: *‘For bipolar or monopolar electrodes, it is obvious that Ag/AgCl*  
331 *was the preferred electrode material.* *‘It is recommended to use pre-gelled Ag/AgCl*  
332 *electrodes.* In our manuscript, the Red Dot 2223 electrodes (pre-gelled Ag/AgCl  
333 electrodes) were used.

334

335 Electrode shape and size: ***'Thus, in the literature both rectangular (bars) and circular***  
336 ***electrodes are being used for SEMG recordings of which circular electrode are by***  
337 ***far the most used.'*** In our manuscript, the Red Dot 2223 electrodes are pre-gelled and  
338 have a surface area of 2.4 cm<sup>2</sup>. To make a fair comparison, our TPP electrodes fabricated  
339 with the same surface area were used.

340

341 Inter-electrode distance: ***'Authors seem to have a preference for IED values which***  
342 ***are a multiple of 10 mm. The largely preferred distance was 20 mm.'*** We have  
343 followed the recommendation and adjusted the IED to 20 mm accordingly.

344

345 Skin preparation: ***'In the remaining 76 (53%) publications, standard skin preparation***  
346 ***techniques were mentioned such as shaving, rubbing/abrasion and cleaning of the***  
347 ***skin, or a combination of these techniques.'*** In fact, one advantage of our TPP  
348 electrodes is that they require no skin preparation or gel, as their soft adhesive properties  
349 allow excellent contact with the skin, even in the presence of hair. Although feasible,  
350 we did not use skin preparation or gel for both the commercial Ag/AgCl and TPP  
351 electrodes to ensure a fair comparison. We specifically selected a less-hairy position on  
352 the arm, which is the FCU, to obtain higher signal quality.

353

354 Sensor location and orientation on the muscle: ***'Globally, three placement strategies***  
355 ***can be discerned: 1. on the center or on the most prominent bulge of the muscle belly***  
356 ***(10 out of 21); 2. somewhere between the innervation zone and the distal tendon (6***  
357 ***out of 21); 3. on the motor point (1 out of 21).'*** Compared to SENIAM, the most  
358 prominent bulge of the muscle belly was also mentioned for electrode placement in this  
359 article. This is the exact location we selected for our comparison tests between Ag/AgCl  
360 and TPP electrodes on FCU, because we are not able to figure out the precise location  
361 mentioned in the second strategy. And the first strategy (on muscle belly) was most  
362 used by other researchers, making us believe our sEMG derivations accords with  
363 international standards.

364

365 In our later sEMG derivations using the MEAP, we adopt a high-density recording  
366 approach instead of the conventional bipolar recording method. This approach allows  
367 us to capture sEMG signals using our novel array patch, which is not currently available  
368 on the market. As a result, it may not always be applicable or appropriate to utilize  
369 established standards designed for conventional tools when designing protocols for our  
370 unique tool. But we still follow the fundamental mechanism of sEMG and some high-  
371 density recording rules<sup>12</sup> to set our protocols, such as the configuration of array, the  
372 attachment position on the muscle and particular tasks for sEMG recording. We believe  
373 the reviewer will understand and appreciate our effort.

374

375 *In addition, any information about the sensor used, such as size of the active area,*  
376 *interelectrode distance and exact position of the electrodes as well as the treatment of*  
377 *the skin, is missing. This information is essential to evaluate the quality of the derived*  
378 *sEMG signals and is standard in any sEMG publication, even when comparing two*  
379 *methods*

380

381 **Our response:** We thank the reviewer asking more details about all EMG recording  
382 process. Upon reevaluation of our manuscript, we have identified that some of the  
383 information, although included, was not presented clearly. We agree with the reviewer  
384 that this information is critical for sEMG publication, and we have summarized these  
385 below.

386

387 Size of the active area: we mentioned them in the experiment section ‘**Impedance**  
388 **measurement**’ on page 34, but we also found the description in ‘**sEMG signal**  
389 **recording**’ is missing, so we added the information to this part.

390 See page 34: ‘2228 and 2223 electrodes have the surface contact area of 2 and 2.4 cm<sup>2</sup>.

391 The TPP electrodes in each comparison test have the same surface contact area with  
392 2228 or 2223 electrodes correspondingly.’

393



394 Interelectrode distance:

395 We added the detailed information to the 'sEMG signal recording' part.

396 See page 34: 'All interelectrode distance for bipolar recording is 20 mm.'

397

398 Position of the electrodes:

399 We added the detailed information to the 'sEMG signal recording' part.

400 See page 34: 'Foam Monitoring 2228 electrodes were used for long-term test, flexibility  
401 test on the forehead, and Red Dot 2223 (USA, 3M) electrodes were used for fatigue  
402 comparison tests. For fatigue comparison tests, electrodes were attached on the most  
403 prominent bulge of the muscle belly of FCU, and different types of electrodes were  
404 attached exactly on the same position.'

405

406 Treatment of the skin:

407 As mentioned in the previous part, no needed treatment of the skin is an advantage of  
408 our electrodes. Thus, we did not use any treatment of the skin in all sEMG tests through  
409 our manuscript.

410 See page 35: 'For all sEMG recording, no skin treatment was used, including shaving,  
411 rubbing or cleaning of the skin.'

412

413 We thank again the reviewer helping us supplement more detailed information to the  
414 manuscript for readers to understand clearer.

415

416 *Additionally, open cable clips were used to fix the cables to the electrodes. This worsens*  
417 *the SNR considerably. Shielded connectors are more common.*

418

419 **Our response:** We acknowledge the reviewer's viewpoint that shielded connectors are  
420 more commonly used and preferable for eliminating factors that may degrade the SNR.  
421 However, we encountered difficulties in finding a shielded connector on the market that  
422 would be compatible with our single-channel TPP electrodes. Developing a custom  
423 shielded connector would have been costly and time-consuming. As a compromise, we

424 opted to use crocodile clips as connectors and employed tape fixation to mitigate SNR  
425 reduction as much as possible. It is worth noting that several articles published in  
426 reputable journals have also used open cables, even at the expense of sacrificing SNR  
427 values<sup>13-15</sup>. In this comparison test, our objective is to assess the performance of the  
428 electrodes rather than solely pursuing the highest SNR. Thus, ensuring a fair  
429 comparison between the two electrode types is our primary focus. As a result, we have  
430 used open cables for both the Ag/AgCl electrodes, based on the same connector used  
431 for the TPP electrodes. This decision was made to ensure consistency and fairness in  
432 our comparison. We hope that the reviewer understands our rationale behind using open  
433 cables for both electrode types.

434

435 *The manuscript is still full of claims - often in the superlative - about signal quality and*  
436 *possible applications of the described electrode, which are not statistically proven. I*  
437 *would like to draw special attention to the statistics here once again! I do not see any*  
438 *statistical calculation in the entire manuscript that shows that the claims made with*  
439 *respect to application are statistically significant, or that at least a tendency can be*  
440 *read. Instead, individual examples are shown, which is good, but does not justify the*  
441 *strong formulations and the emphasis on the new electrode over existing methods. That*  
442 *the major problem with the paper is the lack of statistics.*

443

444 **Our response:** We appreciate the reviewer for bringing up the lack of statistical analysis  
445 in our manuscript. We carefully reviewed our text and found that there was only one  
446 instance of a superlative expression found on page 9: "***In the comparison, we also***  
447 ***found only 6 out of 13 studies discussed sticky electrodes, and our TPP electrodes***  
448 ***perform the best in terms of adhesiveness, which is an important contribution to its***  
449 ***highest SNR among all dry electrodes.***" We provided Figure 2I as supporting evidence,  
450 and all references can be found to support this statement. Thus, we believe that the  
451 superlative expression used in this context is appropriate. With regard to the signal  
452 quality comparison, we agree with the reviewer's suggestion that the inclusion of  
453 statistical analysis would strengthen our results. We have now incorporated statistical

454 analysis into Figure 5d and h. This addition provides more robust evidence to support  
 455 the conclusion that MEAP demonstrates superior performance compared to commercial  
 456 arrays in terms of signal quality and stability.

457

458 See page 18:

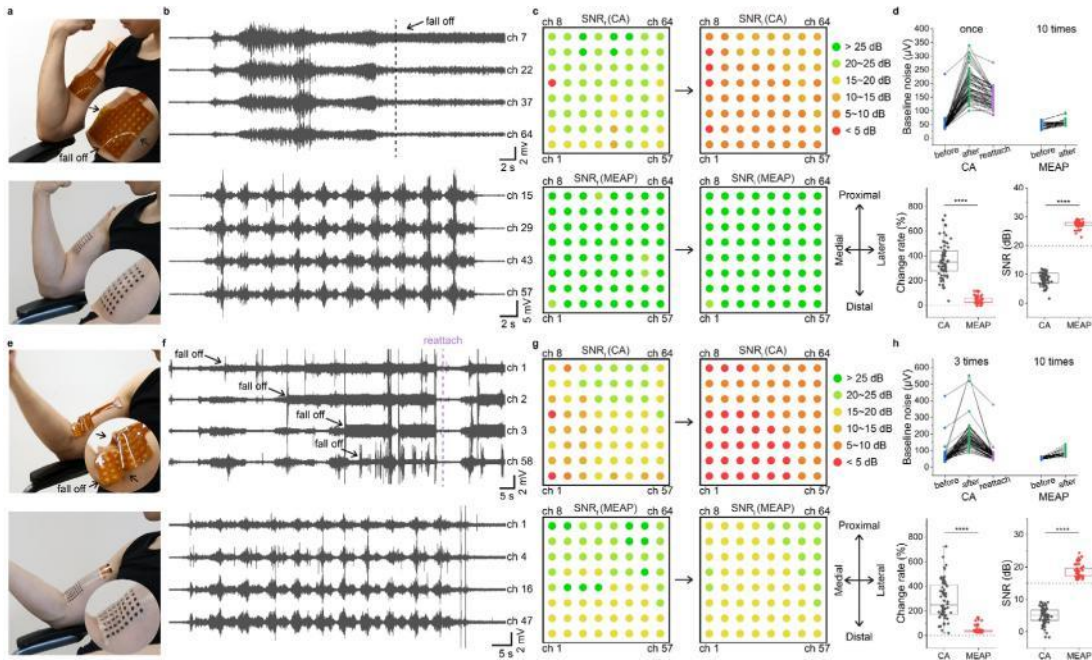

459

460 **Fig. 5 The comparison of attachment performances between commercial array**  
 461 **and MEAP.**

462 **a, e** Photographs of CA and MEAP attachment, illustrating the difference when  
 463 recording from muscle and muscle-tendon junction of biceps brachii.

464 **b, f** sEMG signals recorded using CA and MEAP on muscle and muscle-tendon junction  
 465 of biceps brachii. Four typical channels were picked for each recording.

466 **c, g** Spatial SNR performance map for each channel of CA and MEAP for the first and  
 467 last muscle contraction. SNR<sub>f</sub>: SNR of the first contraction; SNR<sub>l</sub>: SNR of the last  
 468 contraction.

469 **d, h** Statistical analysis of performances between CA and MEAP, including baseline  
 470 noise level of CA before and after one or three muscle contractions, as well as after  
 471 reattachment; baseline noise level of MEAP before and after ten muscle contractions;  
 472 baseline noise change rates before and after muscle contractions; SNR performance of  
 473 the last muscle contraction recorded by each of the CA and MEAP channels.

474 Significance was determined by one sample t test (\*P< 0.05; \*\*P< 0.01; \*\*\*P< 0.001;  
475 \*\*\*\*P< 0.0001).

476

477 We also added statistical information into the caption of Fig. 8 and 'Materials and  
478 Methods' section.

479 See page 28:

480 ... by 6 channels in column 1 of MEAP.

481 f RMS values of sEMG signals against time (left), in the isometric task (middle) and in  
482 the dynamic task (right) across selected channels. n = 54 RMS values per channel. The  
483 box plots show the mean (center square), median (center line), the 25th to 75th  
484 percentiles (box) and the smallest and largest value that is  $\leq 1.5$  times the interquartile  
485 range (the limits of the lower and upper whiskers, respectively)

486

487 see page 37:

488 **Statistical analysis:**

489 Data are presented with mean values  $\pm$  SD, unless otherwise noted in the figure  
490 caption. Significance was defined as \*P < 0.05; \*\*P < 0.01; \*\*\*P < 0.001; \*\*\*\*P <  
491 0.0001. Statistical analysis was performed using Origin Pro 2021.

492

493 We also have other statistical analysis in supplementary information, including  
494 Supplementary Fig. 26-28. Moreover, to explore the potential applications of our MEAP,  
495 we performed the same experiment on three subjects, and comparable results were  
496 obtained. This evidence indicates that our MEAP can be applied consistently and  
497 reliably across different individuals. We agree with the reviewer's suggestion that  
498 including more statistical analysis in this section would better demonstrate the  
499 advantages of our tools. However, as this manuscript primarily focuses on introducing  
500 a new tool rather than presenting a specific clinical application, we believe that too  
501 many samples or tests are not necessary to establish the novelty and validity of our tools.  
502 It is important to consider that conducting statistical experiments would require

503 significant additional expenses and time. We have also observed that the level of  
504 statistical analysis in our manuscript exceeds what is typically found in other similar  
505 publications discussing novel electrodes<sup>13-15</sup>. Overall, while we recognize the value of  
506 additional statistical analysis, we believe that the current evidence and results are  
507 sufficient to establish the uniqueness and potential of our MEAP tool for further  
508 exploration and development.

509

510 *As it stands, there is no evidence for the results in the different applications, and for me*  
511 *that is a no-go for a publication.*

512

513 **Our response:**

514 We appreciate the reviewer's perspective on the applications of our work. However, we  
515 would like to emphasize and clarify the comprehensiveness of our validations again. In  
516 Figure 5, we have already provided evidence that the conformability of our TPP  
517 electrode is superior to that of commercial Ag/AgCl electrodes on the forehead, and the  
518 conformability of MEAP is significantly better than CA on the biceps brachii. Also, we  
519 have shown that different attachment methods significantly impact the Signal-to-Noise  
520 Ratio (SNR). Therefore, logically, repeating the same comparisons in our subsequent  
521 applications is unnecessary, as the issue of conformability arises in most areas of the  
522 body. It is worth noting that in subjects with lower body fat percentage, this issue can  
523 be more pronounced due to greater skin deformation. However, with our MEAP, we  
524 have observed excellent performance not only in signal quality but also in RMS  
525 recording, fatigue recording, and tendon displacement. As a result, this tool is expected  
526 to exhibit superior performance in most sEMG recordings where skin deformation  
527 occurs (which is prevalent across the body). Furthermore, the successful observations  
528 of RMS, fatigue, and tendon displacement enable the application of this tool in muscle  
529 injury prevention. Because monitoring these parameters can help control tendon length,  
530 which is crucial in preventing tendon tears—a common cause of injury. It is important  
531 to clarify that our intention in this article is not to establish clinical criteria, but rather  
532 to show the capabilities of this tool and its potential applications based on those

533 capabilities. However, we would be delighted to conduct further clinical studies with  
534 statistical data using our tools in our future studies. Considering the aforementioned  
535 characteristics, we firmly believe that MEAP brings innovation to the current tool  
536 market, aligning with the standards of the journal.

537

538 *Furthermore, some of the claims about the state of the art of existing sEMG*  
539 *electrode/lead methods are simply wrong. Let me cite the abstract: "However, current*  
540 *sEMG electrodes do not offer adequate high-quality data for their widespread use in*  
541 *clinics and everyday life, since these are neither stretchable nor arrayed". This sentence*  
542 *is simply wrong! Electrode arrays have been available for many years and some of them*  
543 *are stretchable. Whether stretchability improves the clinical significance of the sEMG*  
544 *is unknown, while the clinical benefit of the array is proven. The manuscript is full of*  
545 *such examples and should be formulated in a less absolute way to reflect reality.*

546

547 **Our response:**

548

549 We appreciate the reviewer comments on our inappropriate phrasing. We changed our  
550 abstract as the reviewer advice.

551 See page 1:

552 **‘Surface electromyography (sEMG) can provide multiplexed information about muscle**  
553 **performance. If current sEMG electrodes are stretchable, arrayed, and able to be used**  
554 **multiple times, they would offer adequate high-quality data for continuous monitoring.**  
555 **The lack of these properties delays the widespread use of sEMG in clinics and in**  
556 **everyday life. Here, we address these constraints by design of an adhesive dry electrode**  
557 **using tannic acid, polyvinyl alcohol, and PEDOT:PSS (TPP). The TPP electrode offers**  
558 **superior stretchability (~200%) and adhesiveness (0.58 N/cm) compared to current**  
559 **electrodes, ensuring stable and long-term contact with the skin for recording (>20**  
560 **dB; >5 days). Additionally, we developed a metal-polymer electrode array patch**  
561 **(MEAP) comprising liquid metal (LM) circuits and TPP electrodes. The MEAP**  
562 **demonstrated better conformability than commercial arrays, resulting in higher signal-**

563 to-noise ratio and more stable recordings during muscle movements. Manufactured  
564 using scalable screen-printing, these MEAPs feature a completely stretchable material  
565 and array architecture, enabling real-time monitoring of muscle stress, fatigue, and  
566 tendon displacement. Their potential to reduce muscle and tendon injuries and enhance  
567 performance in daily exercise and professional sports holds great promise.'

568

569 To address the concern raised by the reviewer, we conducted a thorough examination  
570 of our manuscript and made appropriate changes. We specifically focused on ensuring  
571 that all the conclusions presented in the "Results" section were supported by our  
572 experimental findings, thereby minimizing any subjective aspects. Consequently, we  
573 have also revised the introduction and discussion sections to further enhance the clarity  
574 and objectivity of our work.

575 See page 2: 'However, there is very little research using sEMG techniques to make such  
576 tendon identifications.'

577 See page 29: 'However, it is extremely hard for commercial hydrogel electrodes to  
578 accomplish the same recording sites in the same area as MEAP.'

579

580 With regard to reviewer's comments about the clinical significance of stretchability, we  
581 agree that its direct clinical impact has never been examined. However, it is precisely  
582 because of this uncertainty, that we are utilizing our new tool, which has demonstrated  
583 clear advantages in terms of conformability and signal quality during movement, to  
584 explore its potential applications in clinical scenarios. Throughout the manuscript, we  
585 have utilized phrases such as 'we believe,' 'it would be,' 'had great potential,' and 'in  
586 the future' to emphasize that we are not claiming immediate superiority over existing  
587 clinical tools but rather aiming to facilitate further explorations based on our findings.

588

589 In summary, we greatly appreciate the reviewer's insightful comments as they have  
590 significantly improved the manuscript.

591

592

593 **Reference**

- 594 1. Cheng, J. *et al.* Wet-Adhesive Elastomer for Liquid Metal-Based Conformal  
595 Epidermal Electronics. *Adv Funct Mater* 2200444 (2022)  
596 doi:10.1002/adfm.202200444.
- 597 2. Zhong, B., Jiang, K., Wang, L. & Shen, G. Wearable Sweat Loss Measuring Devices:  
598 From the Role of Sweat Loss to Advanced Mechanisms and Designs. *Advanced*  
599 *Science* **9**, (2022).
- 600 3. Fridén, J., Lovering, R. M. & Lieber, R. L. Fiber length variability within the flexor  
601 carpi ulnaris and flexor carpi radialis muscles: Implications for surgical tendon  
602 transfer. *Journal of Hand Surgery* **29**, 909–914 (2004).
- 603 4. Campos, D., Bartholdy, L. M. & Souza. *Case report Accessory flexor carpi ulnaris*  
604 *muscle: a case report of a rare variation in human. J. Morphol. Sci* vol. 27 (2010).
- 605 5. Mesin, L., Merletti, R. & Rainoldi, A. Surface EMG: The issue of electrode location.  
606 *Journal of Electromyography and Kinesiology* **19**, 719–726 (2009).
- 607 6. Martinez-Valdes, E. *et al.* Consensus for experimental design in electromyography  
608 (CEDE) project: Single motor unit matrix. *Journal of Electromyography and*  
609 *Kinesiology* **68**, 102726 (2023).
- 610 7. Gallina, A. *et al.* Consensus for experimental design in electromyography (CEDE)  
611 project: High-density surface electromyography matrix. *Journal of*  
612 *Electromyography and Kinesiology* **64**, 102656 (2022).
- 613 8. Besomi, M. *et al.* Consensus for experimental design in electromyography (CEDE)  
614 project: Amplitude normalization matrix. *Journal of Electromyography and*  
615 *Kinesiology* **53**, 102438 (2020).
- 616 9. Mcmanus, L. *et al.* Consensus for experimental design in electromyography (CEDE)  
617 project: Terminology matrix. *Journal of Electromyography and Kinesiology* **59**,  
618 102565 (2021).
- 619 10. Besomi, M. *et al.* Consensus for experimental design in electromyography (CEDE)  
620 project: Electrode selection matrix. *Journal of Electromyography and Kinesiology*  
621 **48**, 128–144 (2019).
- 622 11. Hermens, H. J., Freriks, B., Disselhorst-Klug, C. & Rau, G. *Development of*  
623 *recommendations for SEMG sensors and sensor placement procedures. Journal of*  
624 *Electromyography and Kinesiology* vol. 10 [www.elsevier.com/locate/jelekin](http://www.elsevier.com/locate/jelekin) (2000).
- 625 12. Merletti, R. & Muceli, S. Tutorial. Surface EMG detection in space and time: Best  
626 practices. *Journal of Electromyography and Kinesiology* **49**, 102363 (2019).
- 627 13. Zhang, L. *et al.* Fully organic compliant dry electrodes self-adhesive to skin for long-  
628 term motion-robust epidermal biopotential monitoring. *Nat Commun* **11**, 4683  
629 (2020).
- 630 14. Tan, P. *et al.* Solution-processable, soft, self-adhesive, and conductive polymer  
631 composites for soft electronics. *Nat Commun* **13**, 358 (2022).
- 632 15. Driscoll, N. *et al.* MXene-infused bioelectronic interfaces for multiscale  
633 electrophysiology and stimulation. *Sci Transl Med* **13**, eabf8629 (2021).

634



## REVIEWER COMMENTS

Reviewer #2 (Remarks to the Author):

The authors have addressed my concerns in the revised manuscript. I would like to recommend its publication in Nature communications.

Reviewer #3 (Remarks to the Author):

I am tired of the discussion with the authors. Either they don't seem to understand my criticisms or, what I think is more likely, they can't address them. Two examples:

The authors use 3M RedDot 2223 and 2228 electrodes. According to the manufacturer, the RedDot 2223 has a diameter of 43.1 mm. When two electrodes are taped side by side for a bipolar lead, the smallest possible interelectrode distance (from centre to centre) is 43 mm. How is an interelectrode distance of 20 mm to be achieved with this? Even if the adhesive surface is reduced by cutting, it is difficult to maintain an interelectrode distance of 20 mm because the active electrode surface has a diameter of 16 mm. With the remaining 4 mm, sufficient adhesion cannot be achieved, which worsens the SNR. Long story short: Neither the 3M RedDot 2223 nor the 2228 meet the SENIAM standard.

Secondly: Statistic is now calculated via repetitions in individual subjects. This makes no sense at all, since the performance of the new electrode depends on where and how well it sticks. And on the other hand, it is known that the performance of different electrodes depends on the individual subject. This is due to the different skin resistance of different test persons. Even if it was tested on three subjects, that is far too few to reach a sustainable conclusion. For me, such arbitrariness does not belong in a scientific paper. The statement alone that a proper study is too time-consuming and expensive (which, by the way, is not an argument) already shows that the authors concede that a scientifically correct investigation of the question could well lead to different results.

1           **Response to reviewers for the manuscript (NCOMMS-22-46103C)**

2

11    *Reviewer #2 (Remarks to the Author):*

12

13    *The authors have addressed my concerns in the revised manuscript. I would like to*

14    *recommend its publication in Nature communications.*

15

16    **Our response:** We truly appreciate the reviewer taking the time to carefully read our

17    revised manuscript and provide such excellent feedback.

18

19    *Reviewer #3 (Remarks to the Author):*

20

21    *I am tired of the discussion with the authors. Either they don't seem to understand my*

22    *criticisms or, what I think is more likely, they can't address them. Two examples:*

23 *The authors use 3M RedDot 2223 and 2228 electrodes. According to the manufacturer,*  
24 *the RedDot 2223 has a diameter of 43.1 mm. When two electrodes are taped side by*  
25 *side for a bipolar lead, the smallest possible interelectrode distance (from centre to*  
26 *centre) is 43 mm. How is an interelectrode distance of 20 mm to be achieved with this?*  
27 *Even if the adhesive surface is reduced by cutting, it is difficult to maintain an*  
28 *interelectrode distance of 20 mm because the active electrode surface has a diameter*  
29 *of 16 mm. With the remaining 4 mm, sufficient adhesion cannot be achieved, which*  
30 *worsens the SNR. Long story short: Neither the 3M RedDot 2223 nor the 2228 meet the*  
31 *SENIAM standard.*

32

33 **Our response:** We value the reviewer's time spent reading our revised manuscript and  
34 raise the concern about electrodes usage again. In Fig. 4e, we presented a photograph  
35 illustrating our method to achieve an IED of 20 mm by cutting the adhesive surface. It  
36 is important to note that both the active electrode surface and the surrounding substrate  
37 exhibit sufficient adhesiveness. Thus, the adhesive properties of the electrodes in this  
38 configuration should be adequate to ensure high-quality recording. Notably, no motion  
39 artifacts were observed in the recording depicted in Fig. 4g. Building upon our  
40 statements in last response letter regarding electrode selection, we maintain that the 3M  
41 RedDot 2223 and 2228 electrodes align with the SENIAM or CEDE standards.

42

43 *Secondly: Statistic is now calculated via repetitions in individual subjects. This makes*  
44 *no sense at all, since the performance of the new electrode depends on where and how*

45 *well it sticks. And on the other hand, it is known that the performance of different*  
46 *electrodes depends on the individual subject. This is due to the different skin resistance*  
47 *of different test persons. Even if it was tested on three subjects, that is far too few to*  
48 *reach a sustainable conclusion. For me, such arbitrariness does not belong in a*  
49 *scientific paper. The statement alone that a proper study is too time-consuming and*  
50 *expensive (which, by the way, is not an argument) already shows that the authors*  
51 *concede that a scientifically correct investigation of the question could well lead to*  
52 *different results.*

53

54 **Our response:** To address the reviewer's concern, we modified Fig. 7, 8 and added  
55 statistics.

56 See page 21: This observation was also verified by palpation on the biceps brachii.

57 **Recording from five different subjects with a total of 15 MEAPs was carried out, and**  
58 **the mean frequency for each channel is plotted unravelling distinct trends reflecting**  
59 **flexion and extension, thereby demonstrating the consistent recording capability of the**  
60 **MEAP in identifying junction positions.**

61

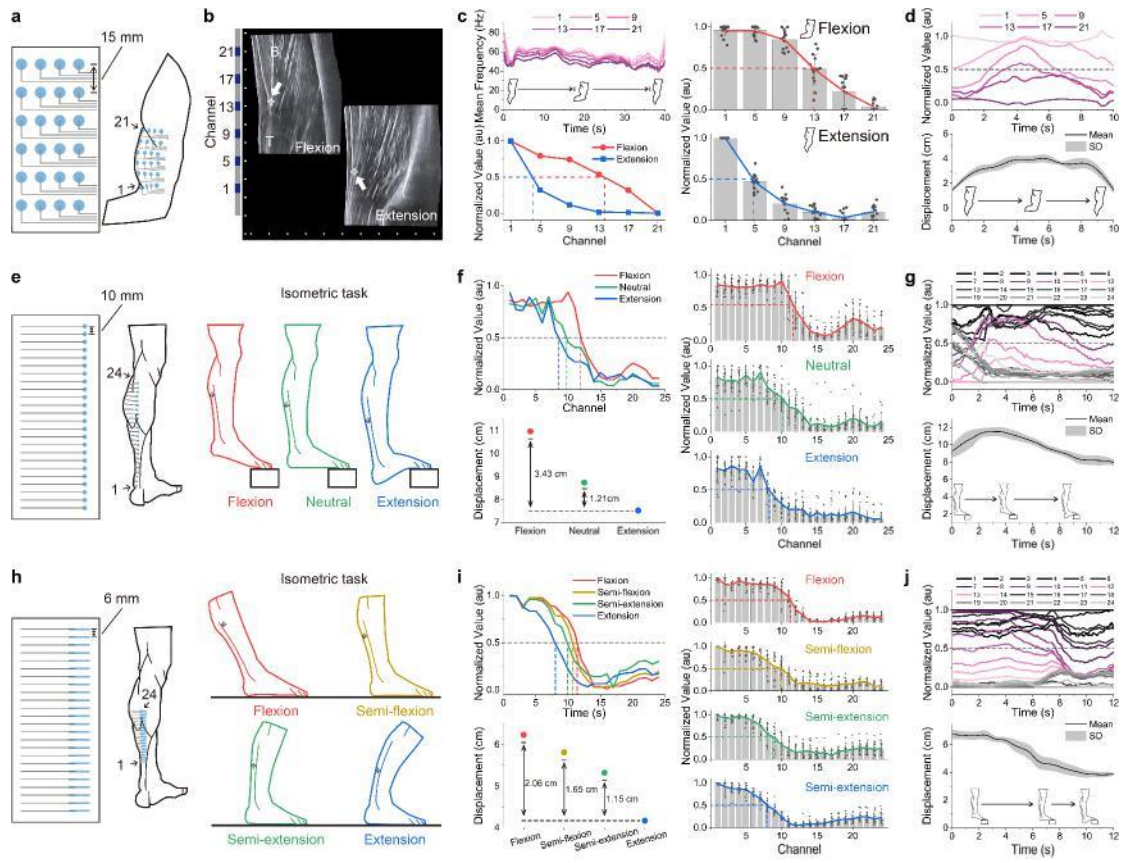

63 **Fig. 7 Location of muscle-tendon junction by MEAP.**

64 **a** Schematic diagram of a MEAP on the biceps. The IED was 15 mm. Channel numbers  
65 (1 – 24) were ordered from left to right and from bottom to top.

66 **b** Ultrasound image of tendon displacement during the isometric task with load of 5 kg  
67 and MEAP relative position on the skin. Scale bar: 1 cm.

68 **c** Mean frequencies of the EMG signals; left panels show data from the biceps brachii  
69 of a representative subject during the isometric task and the normalised mean  
70 frequencies for each channel during flexion and extension. Right panels show the  
71 normalised mean frequency data in multiple subjects. MEAPs were attached on  
72 comparable positions on the biceps brachii muscles of the subjects to obtain junction  
73 locations.

74 **d** Normalised mean frequencies of the EMG signals recorded from the biceps brachii  
75 of a representative subject during the dynamic task and real-time junction displacement  
76 in multiple subjects.

77 **e, h** Schematic diagrams of MEAPs on the gastrocnemius and Achilles tendon, and  
78 isometric tasks on a step and on the ground, respectively; the IEDs were 10 mm and 6  
79 mm respectively. Channel numbers (1 – 24) were ordered from bottom to top

80 **f, i** Normalised mean frequencies of the EMG signals; left panels show data from the  
81 gastrocnemius and Achilles tendon of a representative subject during different isometric  
82 tasks and their corresponding displacements. Right panel shows the normalised mean  
83 frequency data in multiple subjects. MEAPs were attached on similar locations on the  
84 Achilles tendon of subjects to obtain junction locations.

85 **g, j** Normalised mean frequencies of the EMG signals recorded from the gastrocnemius  
86 and Achilles tendon of a representative subject during the dynamic task and real-time  
87 junction displacement in multiple subjects.

88 All displacements represent the distance between the first channel position and the  
89 junction position; all statistical experiments were conducted with the 3 repeated  
90 isometric or dynamic tasks performed by 5 subjects (n=15, different MEAPs used);  
91 mean value is represented as bars and SD means standard deviation.

92

93 Also see page 25: To verify if MEAP can provide such multiplexed information, sEMG  
94 was recorded from the biceps on 5 subjects during 5 sessions. Taking subject A as an  
95 example, each session included isometric and dynamic tasks, with load from 1 to 5

96 kilograms (Fig. 8c, d and supplementary Fig. 23). The sEMG recorded from the 6  
97 channels in the left column and 4 channels in the top row were used for further  
detailed  
98 analysis due to their highest RMS values compared to other columns or rows (Fig. 8e).  
99 The data was statistically verified to confirm that each channel on the MEAP recorded  
100 distinct sEMG information from the muscle (Fig. 8f). Additionally, it was observed that  
101 the activation patterns of the biceps muscle are consistent even among 5 different  
102 subjects. It is worth noting that the variability of data increases as the distance between  
103 the recording channel and the control channel grows. We speculate that this  
104 phenomenon is primarily attributed to variations in muscle length among subjects.  
105 Subsequently, for a more comprehensive examination of the sEMG signals captured by  
106 MEAP, we proceeded with data analysis focused on the recordings obtained from  
107 subject A. In the isometric task, RMS amplitude increased with increasing load (Fig.  
108 8g). ...



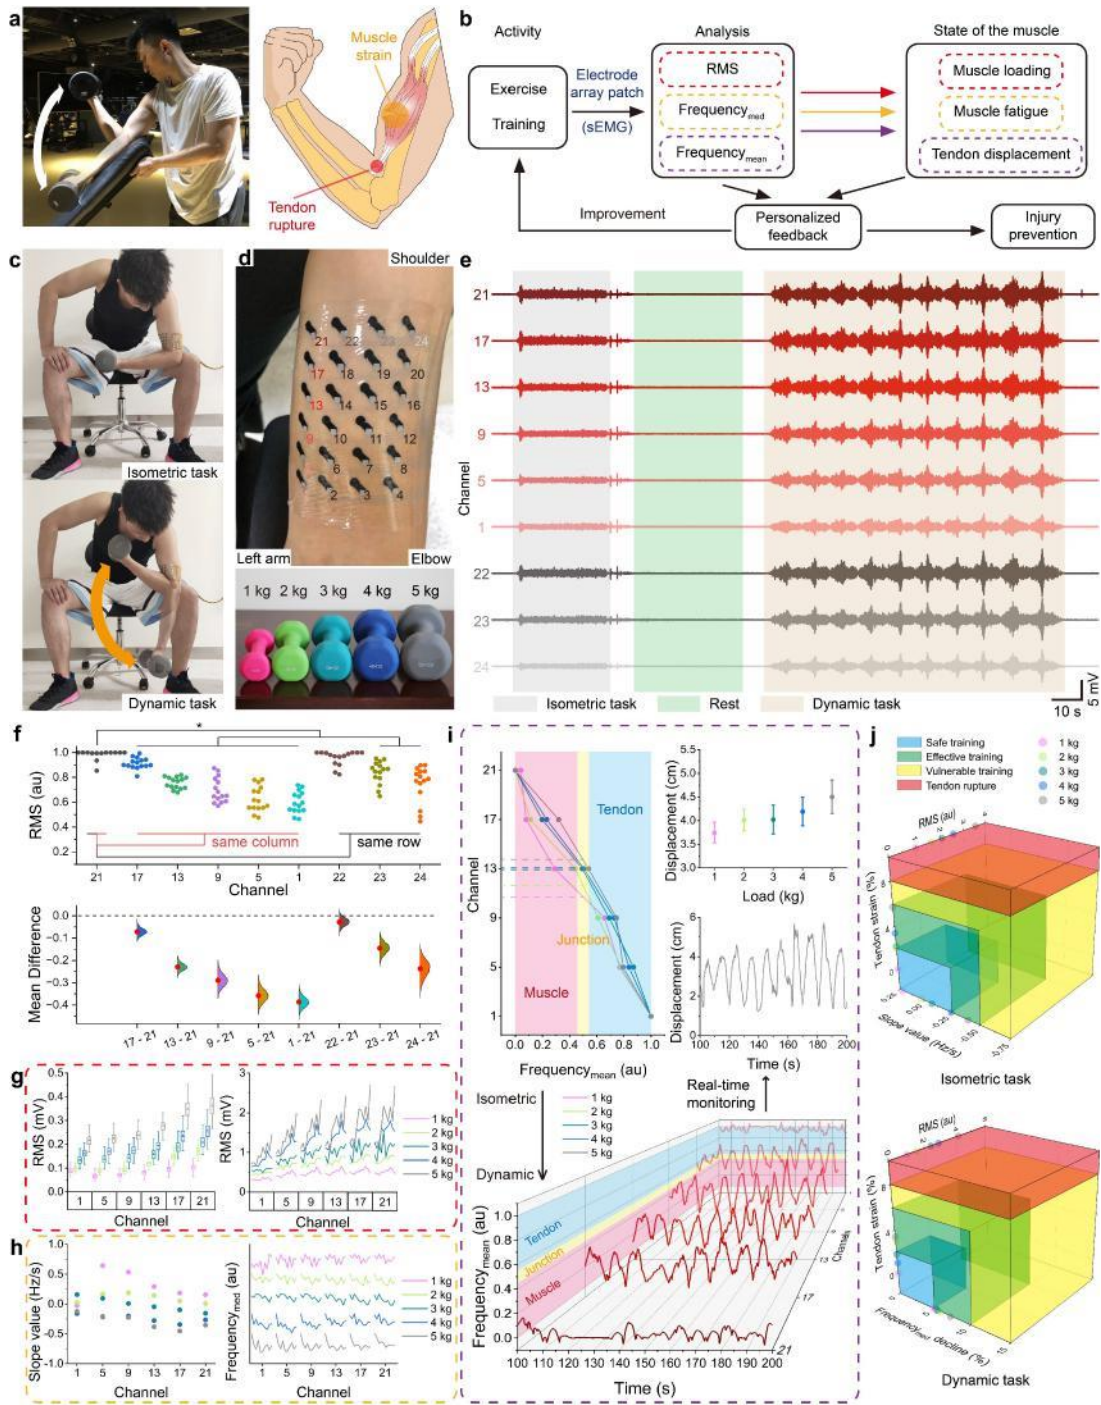

109

110 ... by 6 channels in column 1 of MEAP.

111 **f** Statistical analysis of sEMG signals recorded by MEAP on different subjects. The  
 112 Gardner-Altman plot illustrates the RMS values of sEMG signals captured by MEAPs  
 113 ( $n=15$ , 3 repeated isometric tasks performed by 5 subjects, different MEAPs used). The  
 114 RMS values are normalized to their respective maximum values, and channel 21

115 (control) is compared with others. Significance was determined by one sample t test  
116 (\* $P < 0.05$ ).

117 **g** RMS values of sEMG signals...

118 **j** A visual representation of the potential for muscle injury index, generated based on  
119 the assessments made using the MEAP for isometric and dynamic task. The assessment  
120 is presented as a unified model using the measures obtained from **g-i**. The loads were  
121 classed as safe ( $< 3$  kg), effective (3-5 kg) and vulnerable ( $>5$  kg) based on the subject's  
122 previous experience.

123

124 Some other changes:

125

126 We removed **Supplementary Fig. 31 Summary of muscle information of three**  
127 **subjects** since its content has been demonstrated in Fig. 8.

128

129 To give more details, we added Data analysis section in Materials and Methods.

130 **Data analysis:**

131 All RMS, median frequency, and mean frequency values of the recorded sEMG signals  
132 were computed for time steps of 0.125 seconds, unless specified otherwise. For  
133 dynamic tasks in muscle-tendon junction location section, the mean frequency values  
134 of sEMG data were initially smoothed using a Savitzky–Golay filter (with a frame  
135 length of 21 and an order of 1); for real-time monitoring of dynamic tasks in the same  
136 section, each set of values were determined first and then the means were generated and

137 plotted as mean  $\pm$  SD. In the section of injury prevention, the Gardner-Altman plot  
138 was generated with a confidence level of 0.95 and a total of 5000 bootstrap samples.

139

140 We made adjustments to some sentence structures within our manuscript to enhance  
141 clarity and conciseness, while ensuring that no conclusions have been altered.

142 For some examples,

143 see page 13: Due to the excellent flexibility and adhesiveness of electrode and substrate,  
144 TPP electrodes can always make perfect attachment to the skin no matter if the skin is  
145 compressed or stretched (Fig. 4a).

146 See page 14: To reduce errors caused by fatigue, we linear fitted the first 25 s of each  
147 contraction to quantify the change Linear fittings were made for first 25 s of each  
148 contraction, to quantify the outcome with less errors<sup>73</sup>.

149 See page 21: We verified our MEAP-based findings with ultrasound images of biceps  
150 distal tendon in a representative subject while the subject performed the isometric task  
151 with load of 5 kg (Fig. 7a, Supplementary Video 5). The positional difference of muscle-  
152 tendon junction was about 3.81 cm between flexion and extension confirmed using  
153 ultrasound image (Fig. 7b).

154 See page 22: We also obtained the real-time displacement of Achilles tendon junction  
155 accurately when switching from plantarflexion to dorsiflexion even in different subjects  
156 (Fig. 7g). Once the junction movement range was identified, a MEAP with shorter IED  
157 of 6 mm was used to further improve the precision of the location (Fig. 7h).

158 See page 27: As a result, such a high-possible injured circumstance is depicted as red

159 range in the muscle injury index. For other three ranges, each one should be determined  
160 specifically by the exerciser under professional instructions. The MEAP successfully  
161 provided information about muscle loading, muscle fatigue and tendon displacement of  
162 the other subjects, which verified the stable and reliable recording using MEAP across  
163 all individuals (Supplementary Fig. 29, 30).
