# Supplementary material for: Stretchable surface electromyography electrode array patch for tendon location and muscle injury prevention
Source: PubMed Central journal article supplement (PMC10576757; doi:10.1038/s41467-023-42149-x), 2023-10-14
Supplement: 41467_2023_42149_MOESM3_ESM.pdf [file 41467_2023_42149_MOESM3_ESM.pdf]

## **Description of Additional Supplementary Files**

**Supplementary Movie 1:** Flexibility and stretchability of MEAP.

**Supplementary Movie 2:** Commercial array and MEAP on Biceps Brachii.

**Supplementary Movie 3:** Commercial array and MEAP on muscle-tendon junction.

**Supplementary Movie 4:** Activation zone movement in the heatmap during sEMG recording on biceps brachii.

**Supplementary Movie 5:** Demonstration of ultrasound imaging for muscle-tendon junction location.

**Supplementary Movie 6:** Real-time recording and heatmaps of RMS, median frequencies and mean frequencies of biceps brachii.
